# Supplementary material
Source: PubMed Central journal article supplement (PMC6206850)
Supplement: NIHMS989088-supplement-Supplementary.pdf [file NIHMS989088-supplement-Supplementary.pdf]

## Supporting Information

### DNA-Corralled nanodiscs for the structural and functional characterization of membrane proteins and viral entry

Zhao Zhao<sup>‡#</sup>, Meng Zhang<sup>†</sup>, James M. Hogle, William M. Shih<sup>‡§†</sup>, Gerhard Wagner<sup>†</sup>, Mahmoud L. Nasr<sup>#†\*</sup>

<sup>†</sup>Department of Biological Chemistry and Molecular Pharmacology, Harvard Medical School, Boston, MA 02115, USA;

<sup>‡</sup>Wyss Institute for Biologically Inspired Engineering at Harvard, Boston, MA 02115, USA;

<sup>§</sup>Department of Cancer Biology, Dana-Farber Cancer Institute, Boston, MA 02215, USA

### Supporting Experimental Procedures

#### Expression and Purification of triple cysteine NW11 (3C-NW11)

3C-NW11 construct in pET-28a containing a tobacco etch virus (TEV) protease-cleavable N-terminal His6 tag and a C-terminal sortase-cleavable His6 tag was transformed into BL21-Gold (DE3) competent *Escherichia coli* cells (Agilent). 3L cell cultures were grown at 37 °C with agitation at 200 r.p.m. in Luria broth (LB) medium supplemented with 50 g/ml kanamycin. Expression was induced at an OD600 of 0.6 with 1 mM IPTG, and cells were grown for another 3h at 37°C. Cells were harvested by centrifugation (7,000 × *g*, 15 min, 4 °C), and cell pellets were stored at -80 °C.

3C NW11 was purified as follows; Pellets of cells were resuspended in Buffer A (50 mM Tris-HCl, pH 8.0, 500 mM NaCl, 8 mM BME) plus 1% triton X100 and lysed by sonication on ice. Lysate was centrifuged (35,000 × *g*, 50 min, 4 °C), and the supernatant was loaded onto a Ni<sup>2+</sup>-NTA column. Resin was washed with 10 CV of the following buffers: buffer A + 1% Triton X-100, buffer A + 50 mM sodium cholate, buffer A, and buffer A + 30 mM imidazole. Proteins were eluted with buffer A + 500 mM imidazole.

#### Reconstitution of 3C-NW11 nanodiscs

We used ratio of 1:75 3C-NW11:lipid to assemble nanodiscs. Lipids (POPC:POPG, 3:2; solubilized in sodium cholate) and 3C-NW11 were incubated on ice for 1 h. After incubation, sodium cholate was removed by incubation with Bio-beads SM-2 (Bio-Rad) for 1 h on ice followed by incubation overnight at 4 °C. The nanodisc preparations were filtered through 0.22 m nitrocellulose-filter tubes to remove the Bio-beads. The nanodisc preparations were further purified by size-exclusion chromatography while monitoring the absorbance at 280 nm on a Superdex 200 10 × 300 column equilibrated with 20 mM Tris-HCl, pH 7.5, 100 mM NaCl, 8 mM BME, 0.5 mM EDTA. Fractions corresponding to the size of each nanodisc were collected and concentrated. The purity of nanodisc preparations was assessed using SDS-PAGE.

#### Nanodisc-DNA conjugation and purification

The bifunctional cross linker Sulfo-SMCC (Thermo Scientific) was dissolved in anhydrous dimethylsulfoxide (DMSO) to give a final concentration of 100 mM. 10 nmoles of DNA oligo (with primary amine modification, /5AmMC6/TAGATGGAGTGTGGTGTGAAG) was incubated with a 100 times molar excess of the crosslinker in buffer B (100 mM NaPi, pH 8.0, 150 mM NaCl and 7.5% DMSO) for 1 h at 23°C. The reaction mix was applied to Amicon filter (Millipore, 3kD) and centrifuged at 7000 rpm for 50 min (repeat 3 times), and then went through a disposable Bio-rad P-6 spin column to remove excessive cross linker.

Next, 50 uL of 5 uM nanodisc was incubated with purified DNA oligo-SMCC from the first step at 23°C in buffer C (containing 100 mM NaPi, pH 7.4, 150 mM NaCl) for 2 h (DNA:nanodisc ratio 12:1). We

removed the BME from the nanodisc sample right before the incubation with DNA oligo-SMCC by applying it to Bio-rad P-6 spin column. The oligo-conjugated nanodisc was then purified by size exclusion chromatography (preferred, **Figure S1**) or by using Centricon concentrators (30 kDa MW cutoff, Millipore) and centrifuging at 4000 g for 10 min (repeat 5 times).

### **Design and assembly of DNA origami structures**

The DNA origami/crystal nanostructures were designed using the software caDNAo.<sup>1</sup> DNA Origami was folded by mixing p7308 scaffold at 10 nM with 10-fold excess of staples in folding buffer (containing 5 mM Tris-HCl, 1 mM EDTA, 12 mM MgCl<sub>2</sub>, pH 8) and subjected to a thermal annealing ramp (from 65°C to 25°C over 20 h). Well-folded DNA origami was purified by a rate-zonal centrifugation procedure using a 15-45% (v/v) glycerol gradient.

### **Assembly of oligo-conjugated nanodisc with DNA Origami**

Excess of oligonucleotide-conjugated nanodisc was incubated with the DNA corrals containing handle strands (5'-CTTCACACCACACTCCATCTA-3'). Nanodisc assembly was performed in buffer containing 5mM Tris-HCl, 1mM EDTA, 10 mM MgCl<sub>2</sub>, using an annealing protocol, in which the temperature was gradually decreased from 37 °C to 4 °C over 2 h.

### **Large lipid nanodisc reconstitution**

DNA corrals containing small nanodiscs were mixed with 9X amount liposomes (POPC:POPG:cholesterol:DGS-NTA(Ni) ratio of 51:34:10:5, for the poliovirus experiment) then diluted with tris buffer containing octyl glucoside (5 mM Tris, 1 mM EDTA, 12 mM MgCl<sub>2</sub>, pH 8, 0.7% OG). Next, this solution was incubated on a Thermomixer at 300 rpm at room temperature for 1 h. The entire solution was then transferred into a 7K MWCO Slide-a-Lyzer dialysis cassette (Thermo Scientific). The cassette was dialyzed against 2 L of tris buffer for 48 h. After dialysis, the sample was recovered from the dialysis cassette and concentrated using an Amicon column. Reconstituted nanostructures were separated from excess lipids by equilibrium centrifugation using sucrose gradient (30, 25, 20, 15, 10 from bottom to top). The gradient solutions were layered into ultracentrifuge tubes and centrifuged at 48,000 rpm for 5 h at 4°C. The gradient was fractionated, and aliquot of each fraction was checked for the presence of assembled DCND.

### **VDAC-1 production**

Human VDAC1 was expressed, purified and refolded as detailed previously.<sup>2-3</sup> Briefly, the plasmid containing pET21d:hVDAC1 (VDAC1(1–283)-Leu-Glu-His<sub>6</sub>) construct was transformed to BL21 (DE3) competent cells. Expression of hVDAC1 was carried out in LB medium and induced by 1mM IPTG at 37 °C for 3~5 hours. Cells were lysed and the inclusion bodies containing hVDAC1 were collected and solubilized in denaturing buffer (8 M urea, 50 mM Tris-HCl, pH 8.0, 250 mM NaCl, 20 mM imidazole). hVDAC1 was subsequently purified with Ni-NTA resin and precipitated through dialysis against dialysis buffer (50 mM Tris-HCl, pH 8.0, 50 mM NaCl, 1 mM EDTA, 5 mM DTT). The precipitate was collected and dissolved in 6M guanidine hydrochloride buffer. Refolding of hVDAC1 was carried out at 4 °C by very slow, dropwise dilution into 10x volume of refolding buffer (50 mL; 50 mM NaPi, pH 6.8, 100 mM NaCl, 1 mM EDTA, 5 mM DTT, 1% (43 mM) lauryldimethylamine oxide (LDAO)). The refolded hVDAC1 was further purified through cation exchange chromatography, from which the fractions containing properly folded hVDAC1 were pooled and concentrated for nanodisc reconstitution.

### **Transmission electron microscopy**

For imaging, particles were adsorbed onto glow discharged carbon-coated TEM grids (Ted Pella) and then stained using a 0.7% (for the poliovirus samples) or 2% aqueous uranyl formate solution. The samples were visualized with a JEOL JEM-1400 TEM, operated at 80 kV in the bright-field mode.

**Cryo electron microscopy**

Gatan CP3 system was used to plunge-freeze a glow-discharged Quantifoil grids (EMS, Hatfield, PA) after the application of 3  $\mu$ l of the poliovirus-DCND solution (blot times set to 3, 4 or 5s). Grids were transferred into an FEI F20 electron microscope operating at an acceleration voltage of 200 kV. Micrographs were acquired on a K2 Summit camera (Gatan, Pleasanton, California) in super-resolution mode.

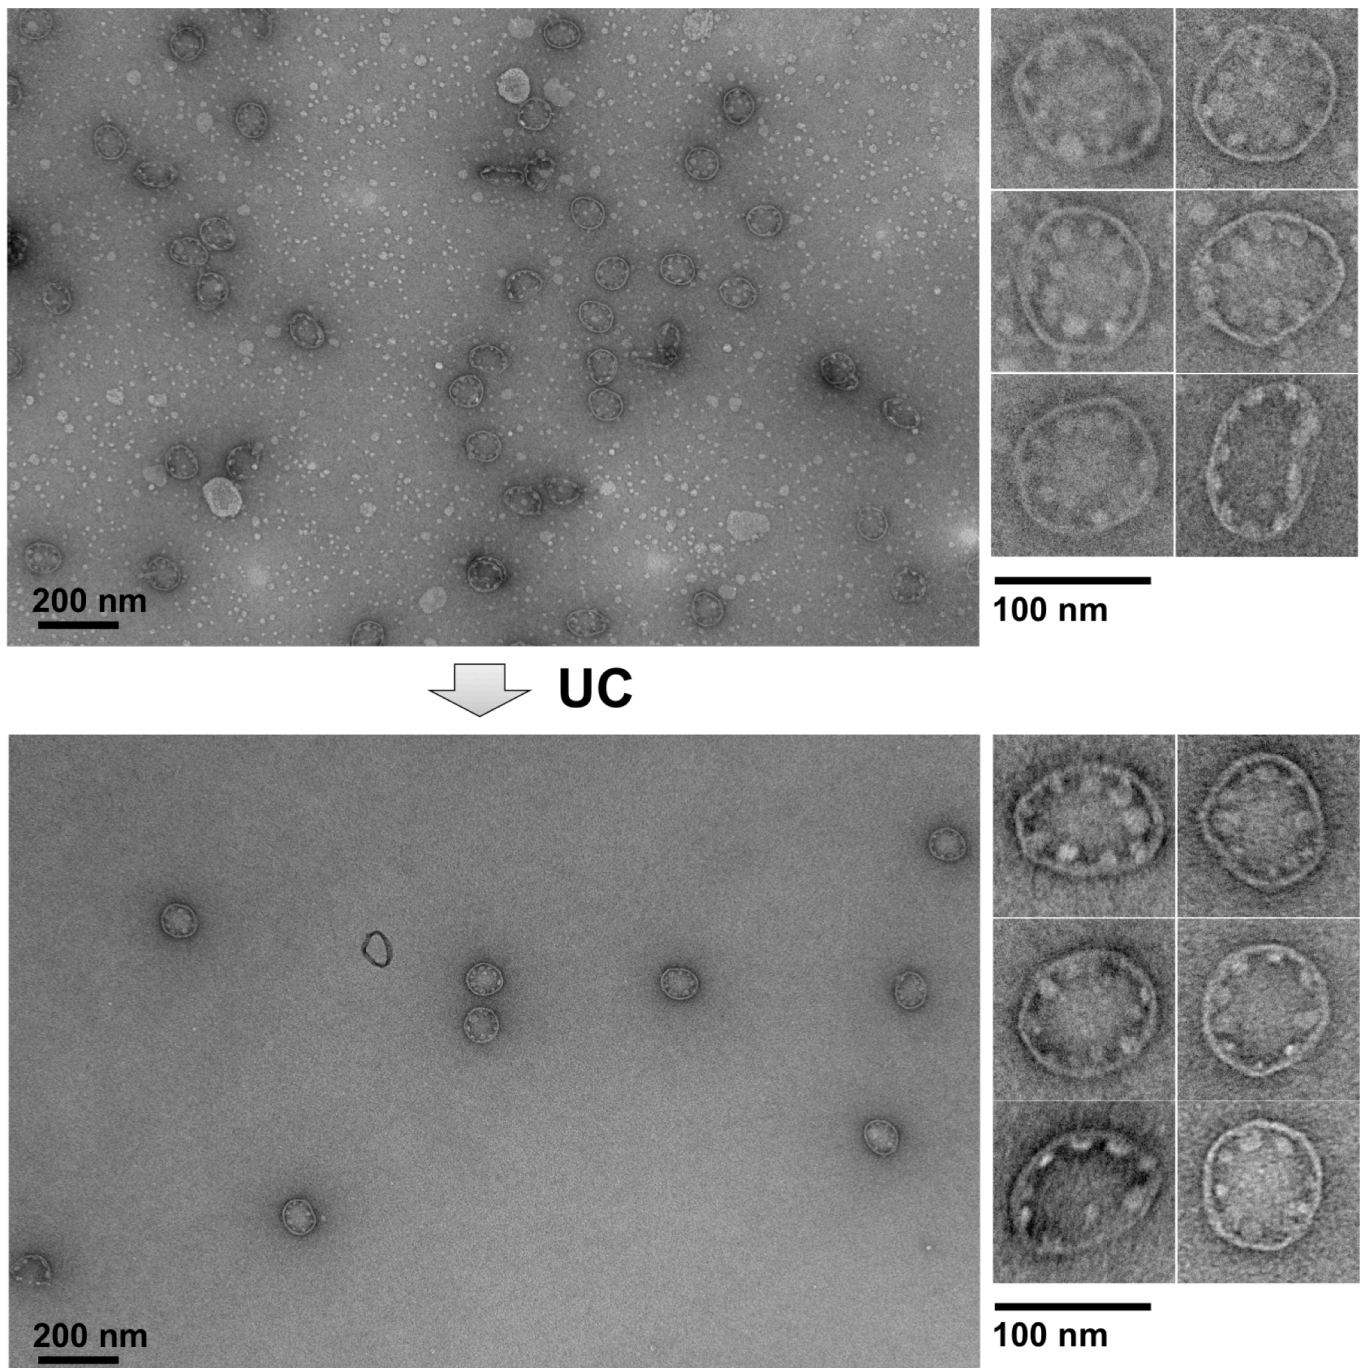

**Figure S1. TEM analysis of 90 nm DNA-origami barrel after assembly with small nanodiscs. (top) TEM image of DNA-origami barrel after assembly with small nanodiscs. (bottom) TEM image after the ultracentrifugation (UC) step to remove uncoupled, free nanodiscs.**

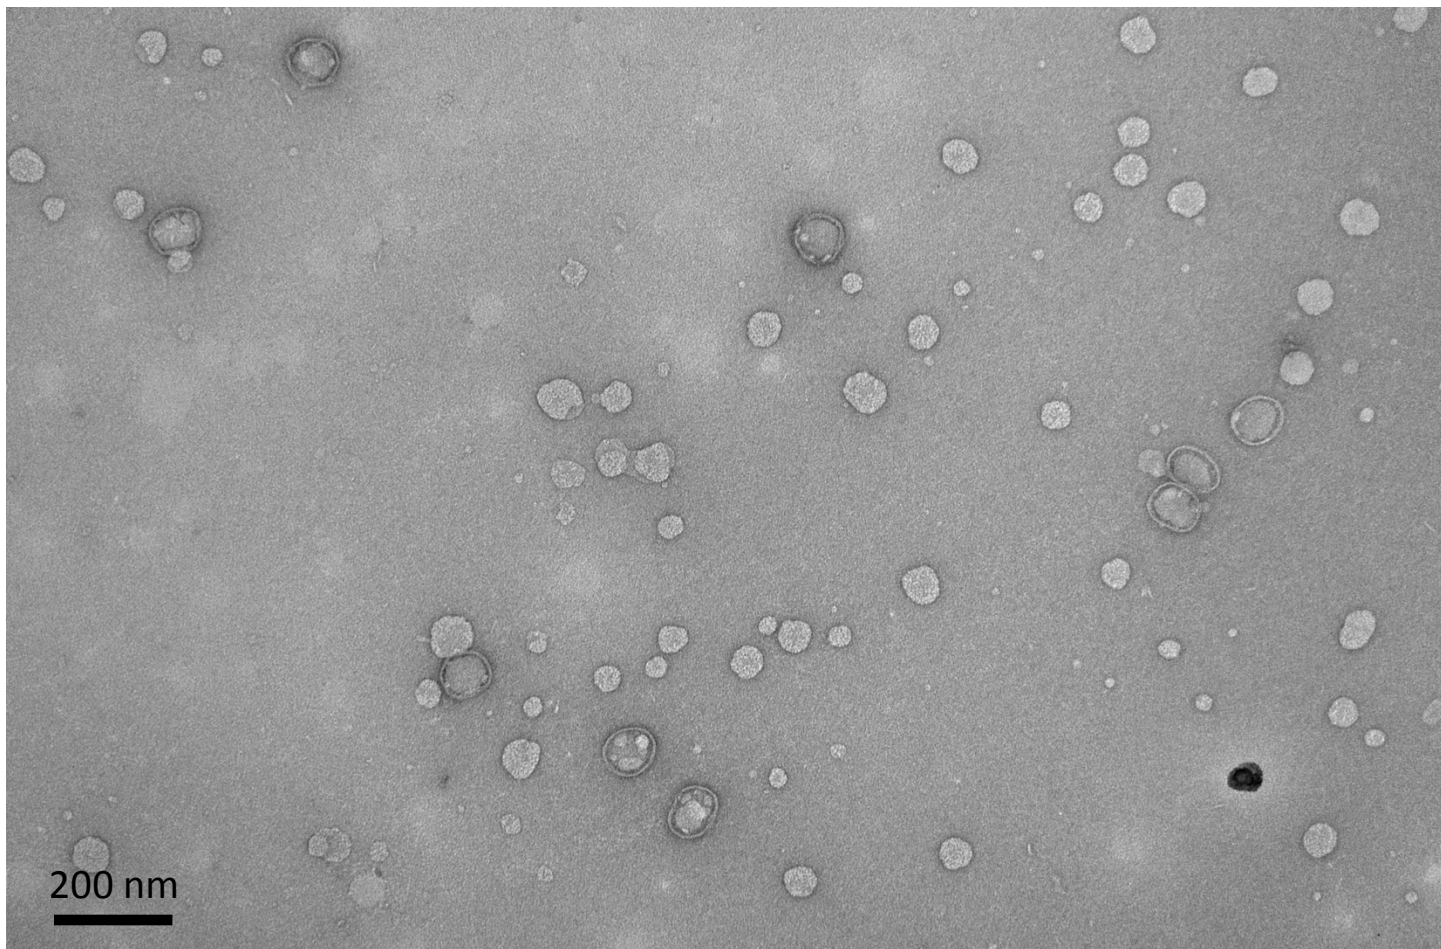

**Figure S2. TEM of DCND reconstituted inside 90-nm barrel.** Negative-stain images show the formation of integrated large sized nanodiscs inside the DNA barrel. The image also shows the formation of free lipid vesicles outside the DNA barrels. Reconstituted DNA nanostructures were separated from excess lipid vesicles by sucrose gradient at a later step. The POPC/POPG lipid mixture was used in the reconstitution of DCND.

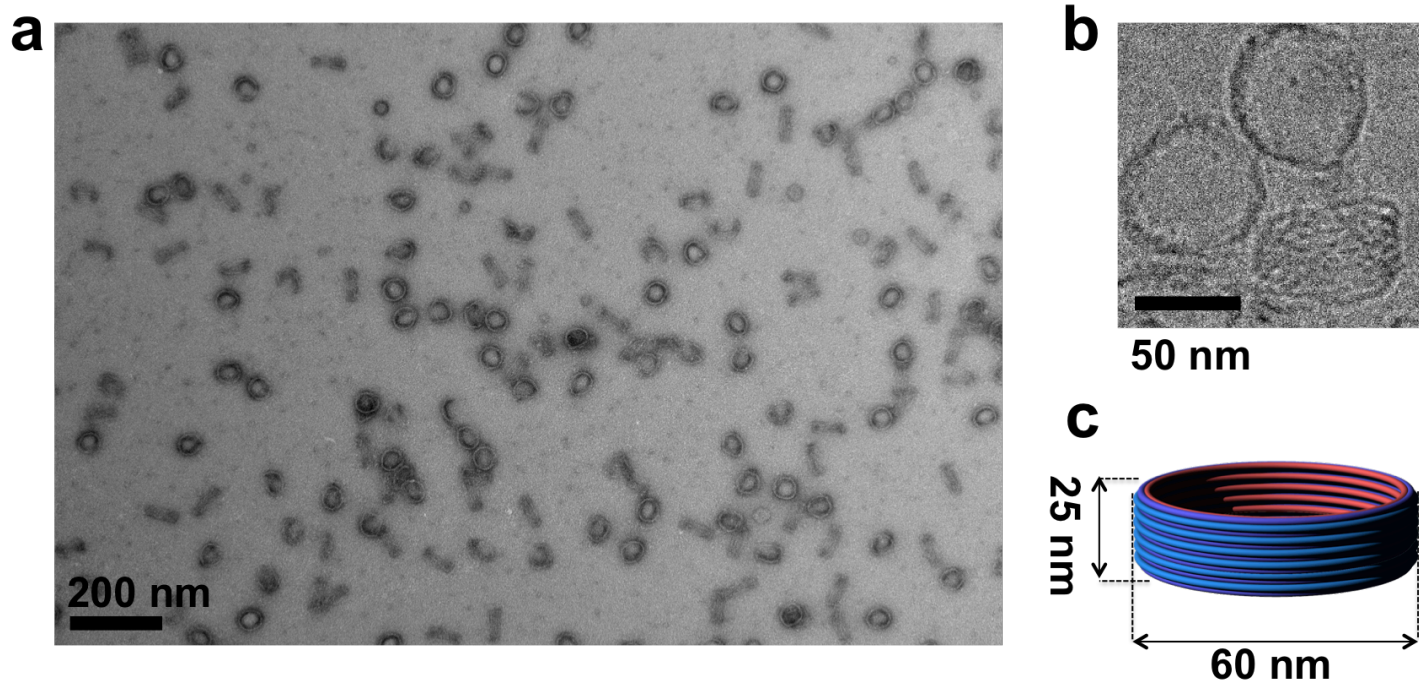

**Figure S3. TEM characterization of 60-nm DNA-origami-barrel without a bilayer.** (a) Negative-stain EM for the 60 nm barrel. (b) Cryo-EM of empty 60 nm DCND particles (lacking membranes). The Image shows the side and top views side by side. (c) The dimensions of DNA origami barrel.

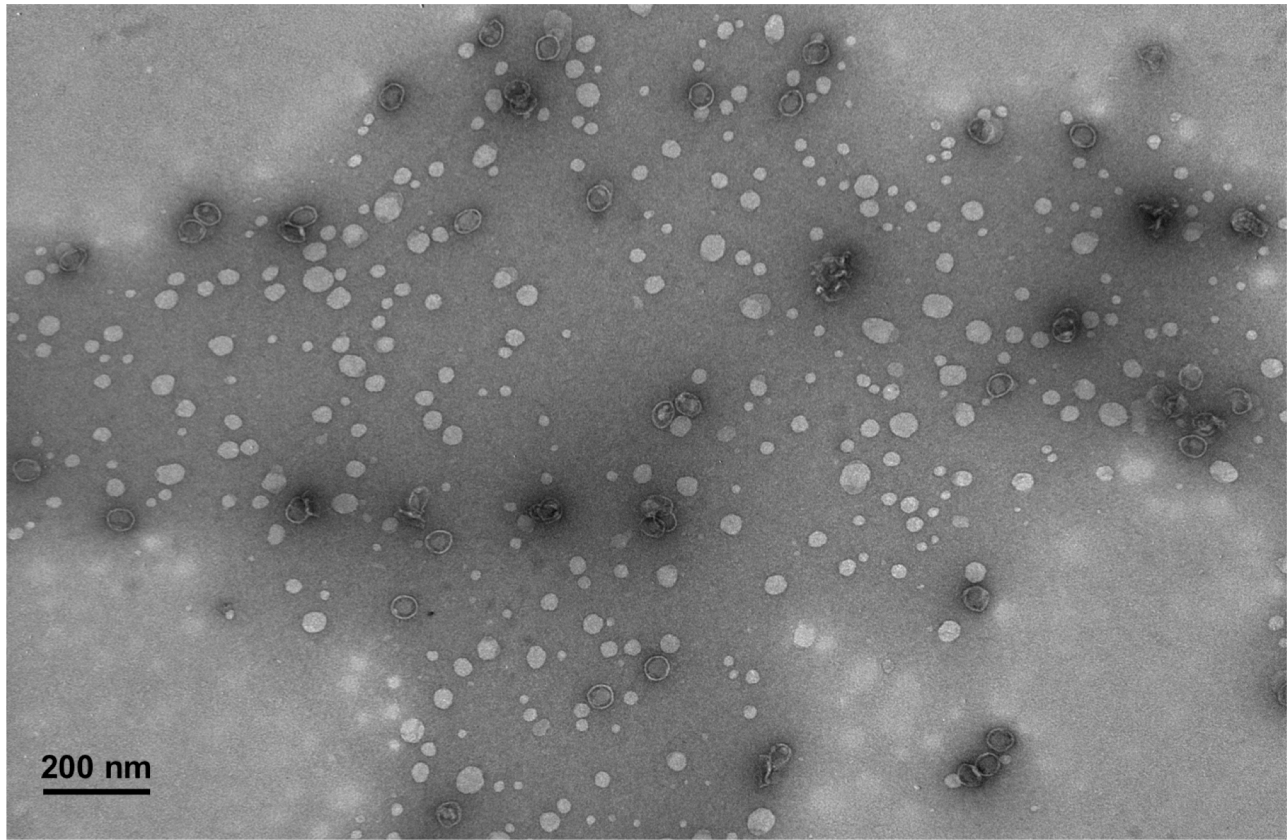

**Figure S4. TEM analysis of DCND reconstituted inside 60-nm barrel.** The image also shows the formation of free lipid vesicles outside the DNA barrels. The free lipid vesicles can be removed at a later step by sucrose gradient.

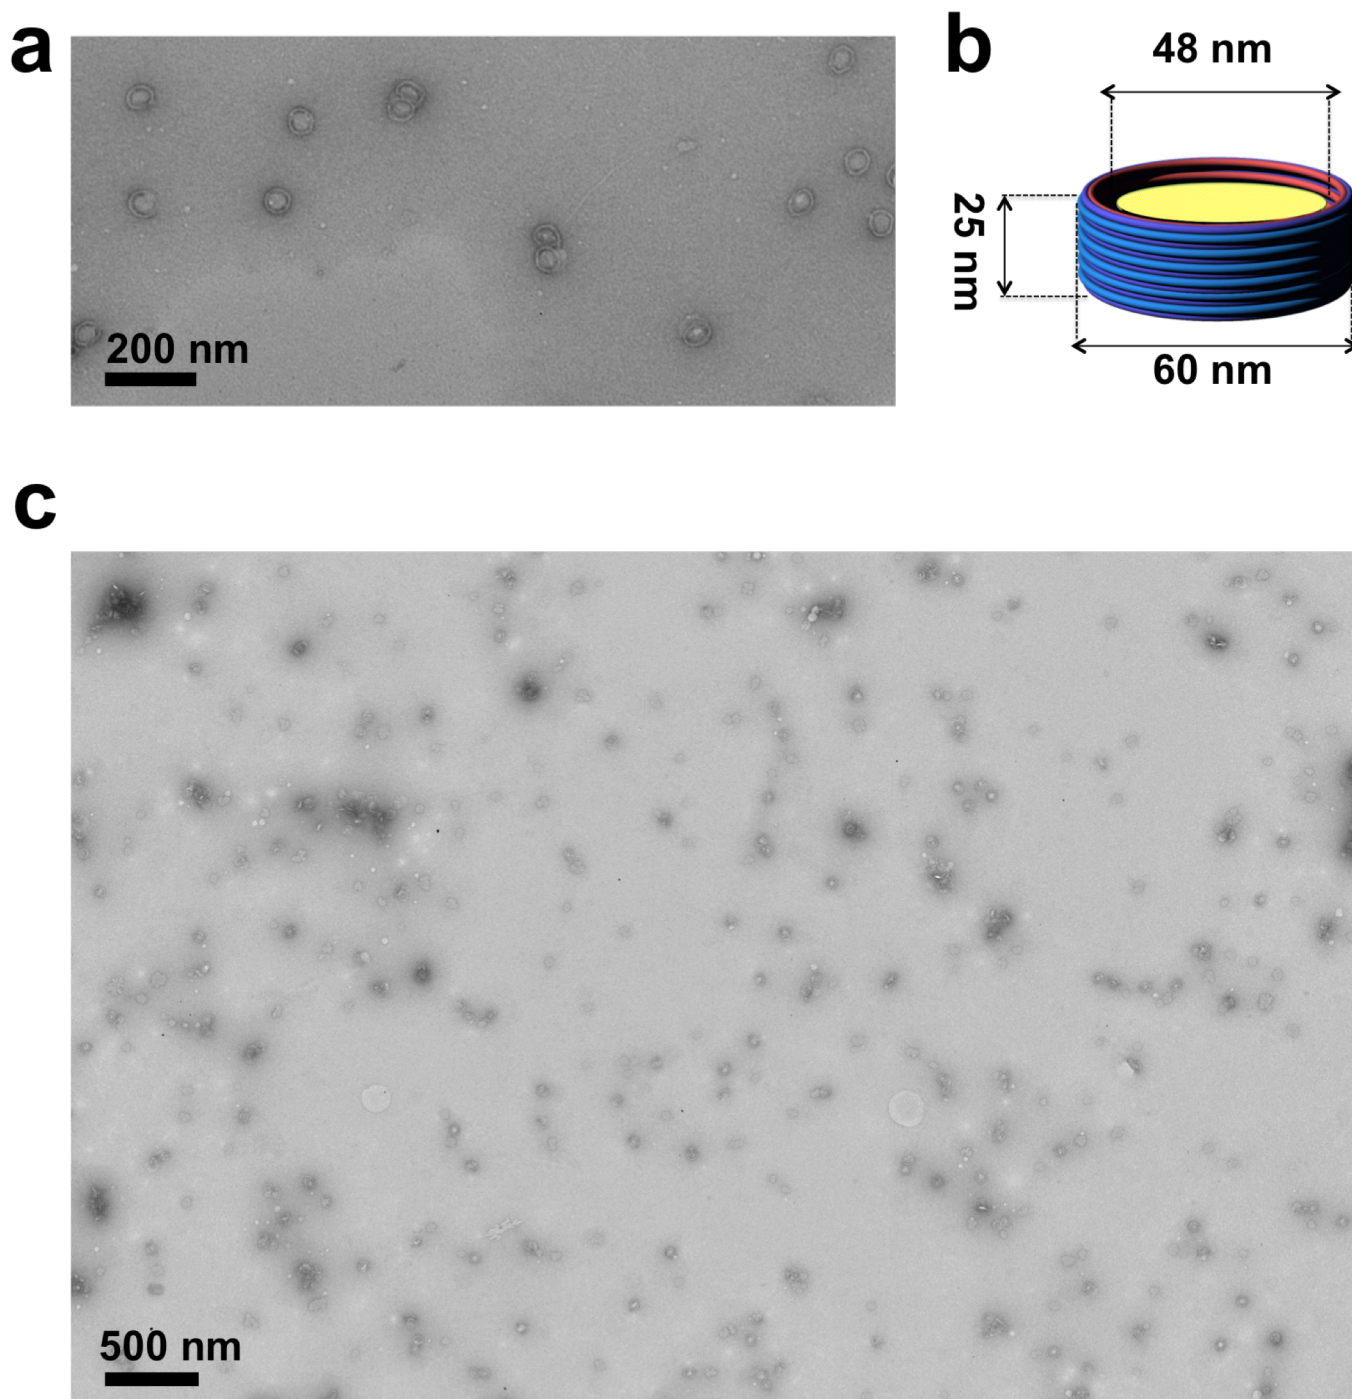

**Figure S5. TEM analysis of 60 nm DCND after the sucrose gradient step. (a)** Negative-stain image for the 60 nm DCND **(b)** The dimensions of the 60 nm DCND. **(c)** Zoom-out view of 60-nm DCND.



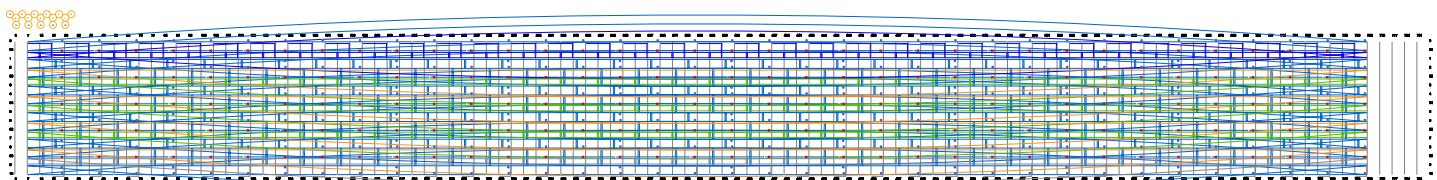

**Figure S6. caDNAno design of 90 nm DNA barrels.**

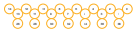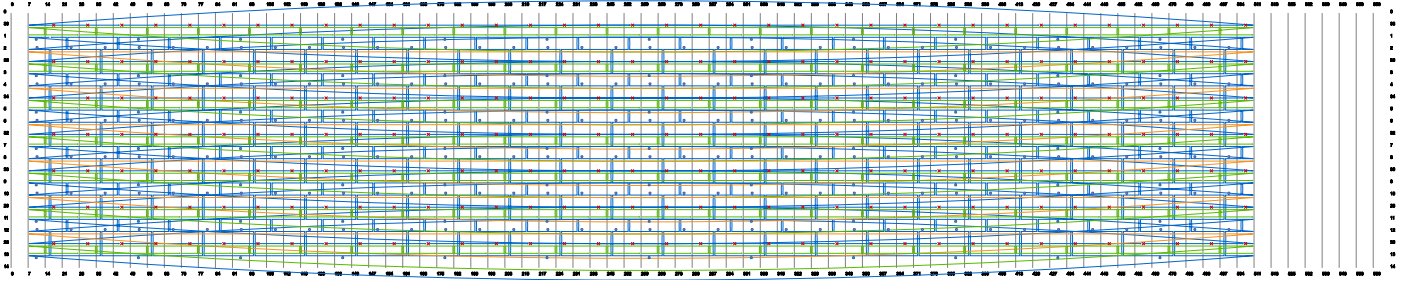

**Figure S7. caDNAno design of 60 nm DNA barrels.**

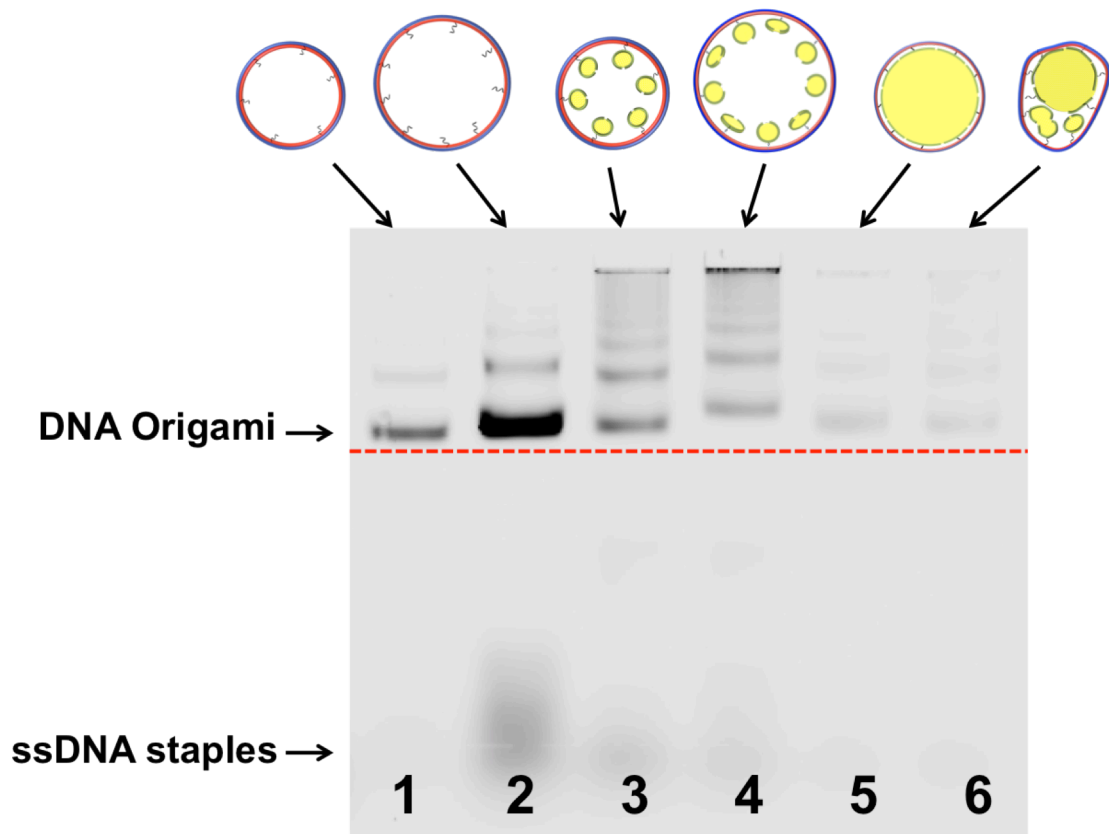

**Figure S8. Native Agarose gel electrophoresis for DCND.** Lane 1: folded 60-nm DNA barrel only, lane 2: folded 90-nm DNA barrel only, lane 3: folded 60-nm DNA barrel containing small nanodiscs, lane 4: folded 90-nm DNA barrel containing small nanodiscs, lane 5, 6: 60 nm DCND reconstituted with different amount of lipids.

### a SDS-PAGE

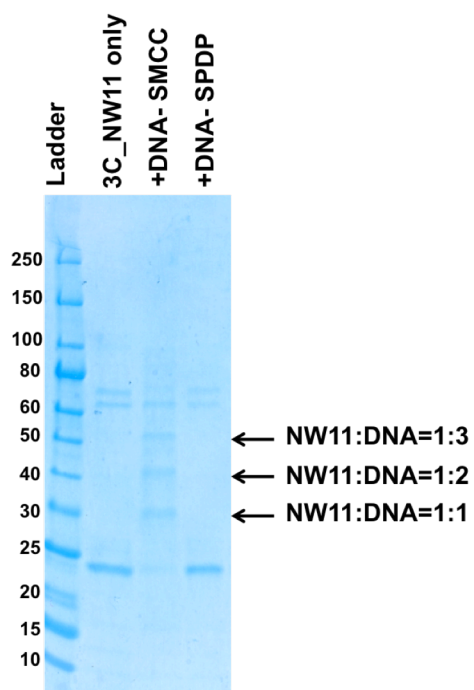

### b Size exclusion chromatography

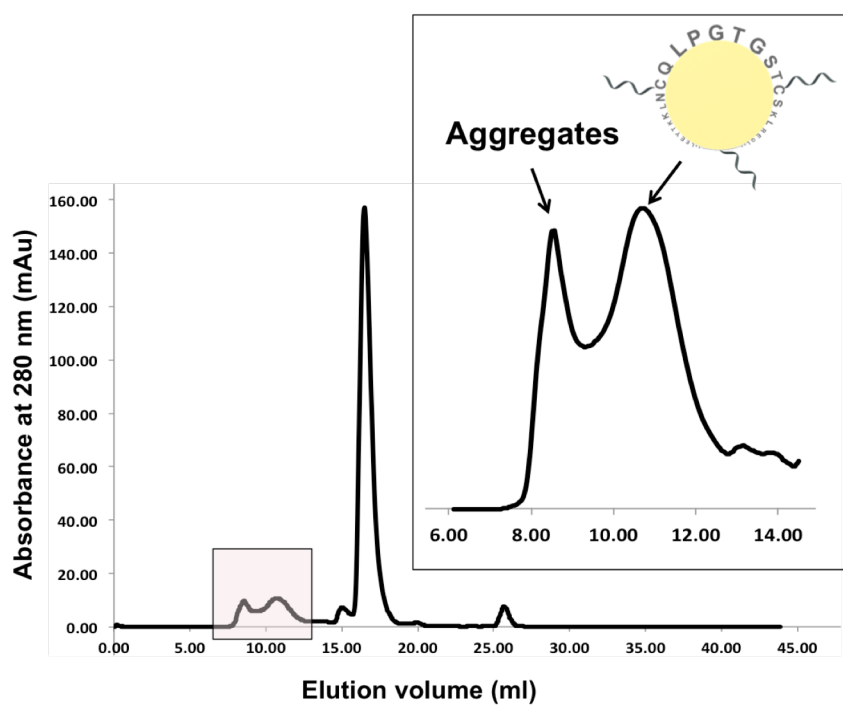

**Figure S9. Coupling of DNA oligos to nanodisc.** (a) SDS-PAGE of SMCC and SPDP coupling. SMCC coupling resulted in better yield. (b) Size exclusion chromatography was performed to purify oligo-nanodiscs from free oligos and aggregates.

**a**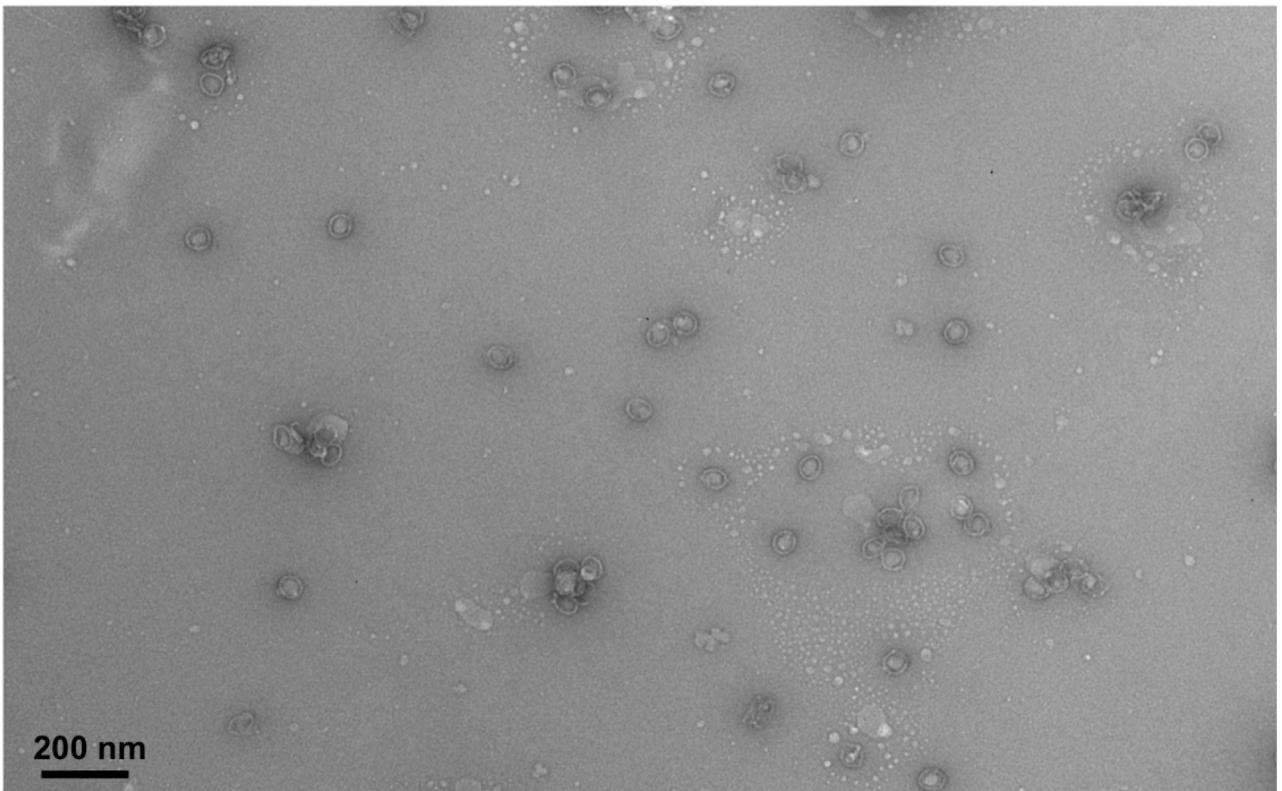**b**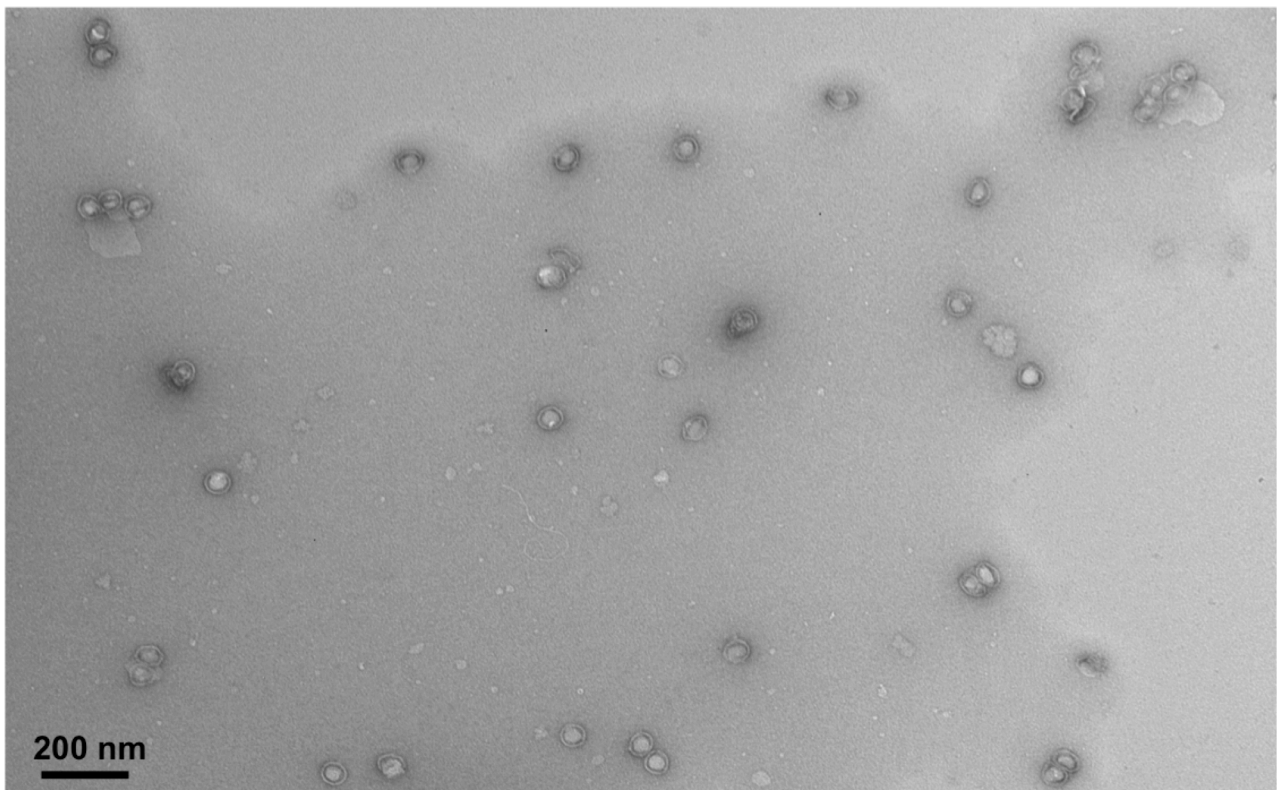

**Figure S10. TEM analysis of 60 nm DCND before and after storage for 7 days at 4°C. (a)** TEM image for the 60 nm DCND taken on day 1 after assembly. **(b)** TEM image for the 60 nm DCND after storage for 7 days at 4°C.

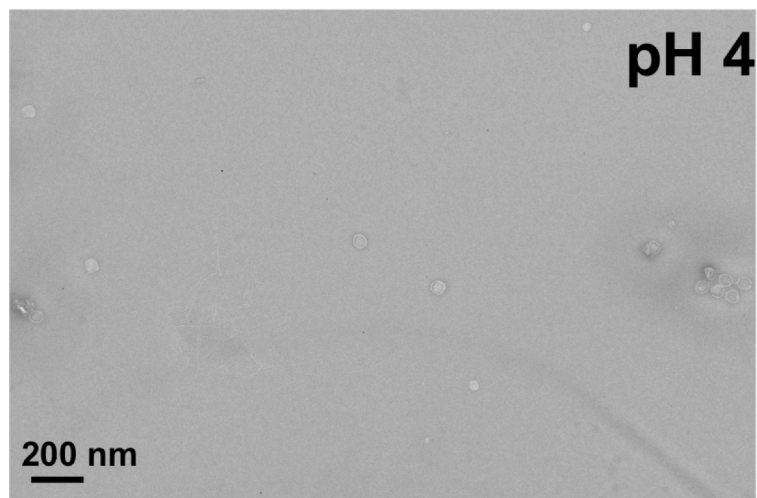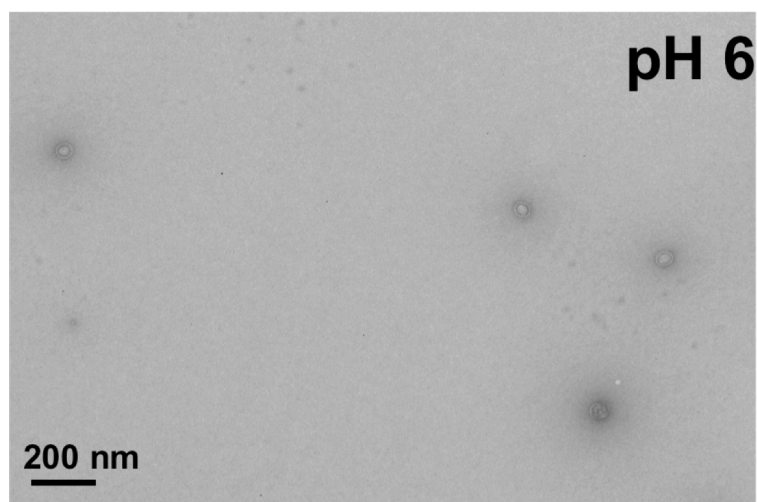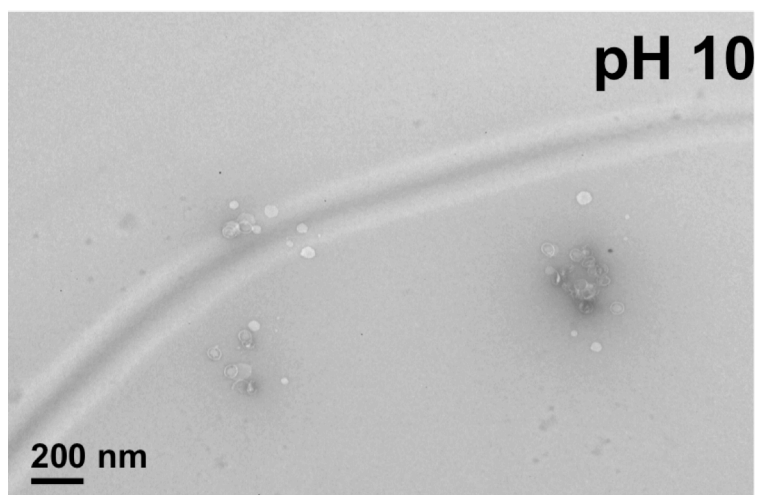

Figure S11. TEM characterization of 60-nm DCND samples in 1X TE-Mg<sup>2+</sup> buffer at different pH.

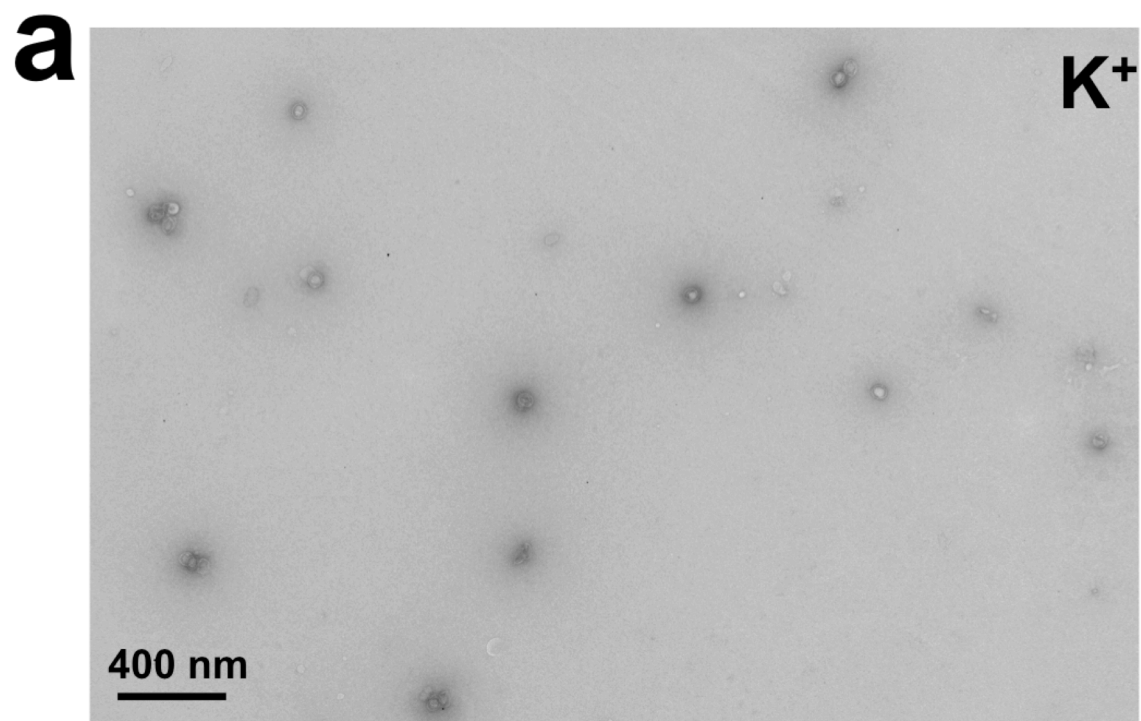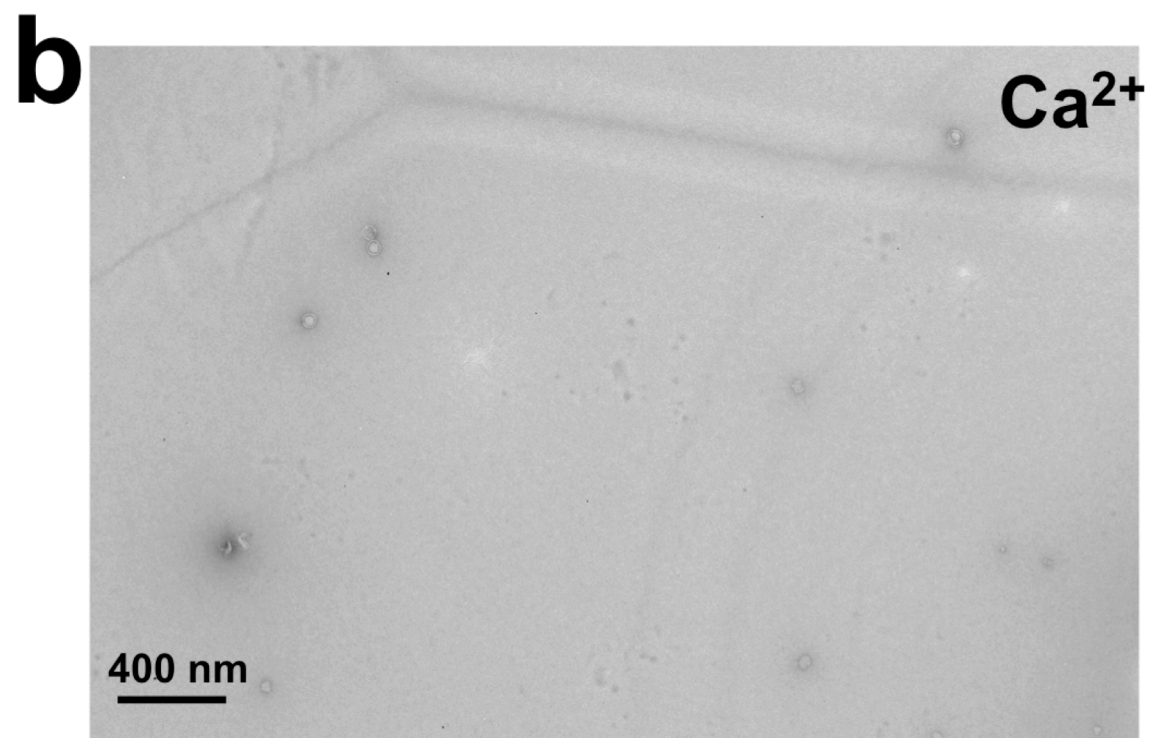

**Figure S12.** TEM characterization of 60-nm DCND in presence of 50 mM K<sup>+</sup> (a) and 10 mM Ca<sup>2+</sup> (b) buffers.

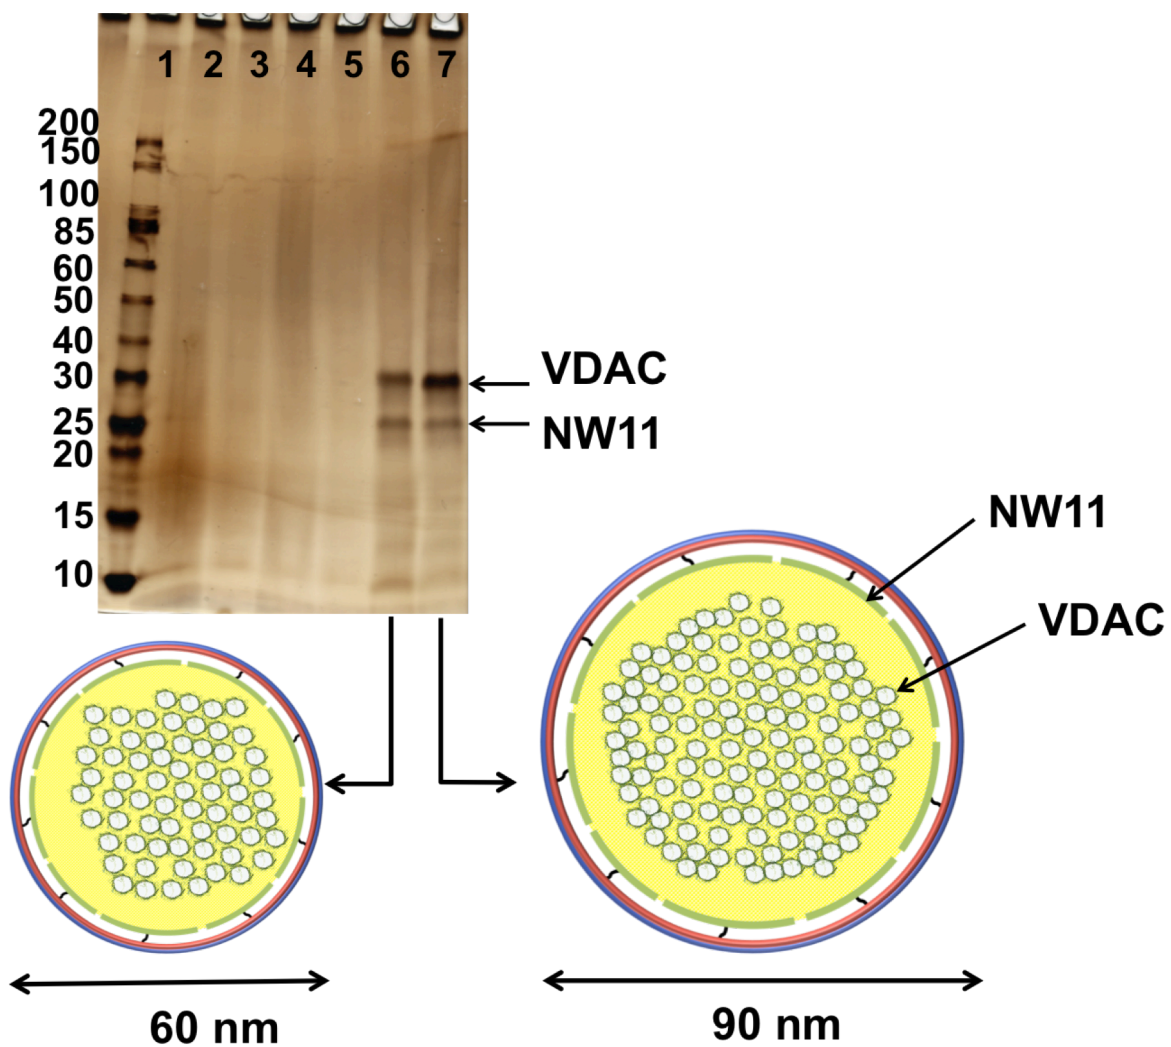

**Figure S13. SDS-PAGE analysis for purified 60 and 90 nm DCND.** Samples were visualized by silver stain. Lane 6: 60 nm DCND containing VDAC. Lane 7: 90 nm DCND containing VDAC. The analysis confirms the incorporation of VDAC into both 60 and 90 nm DCND.



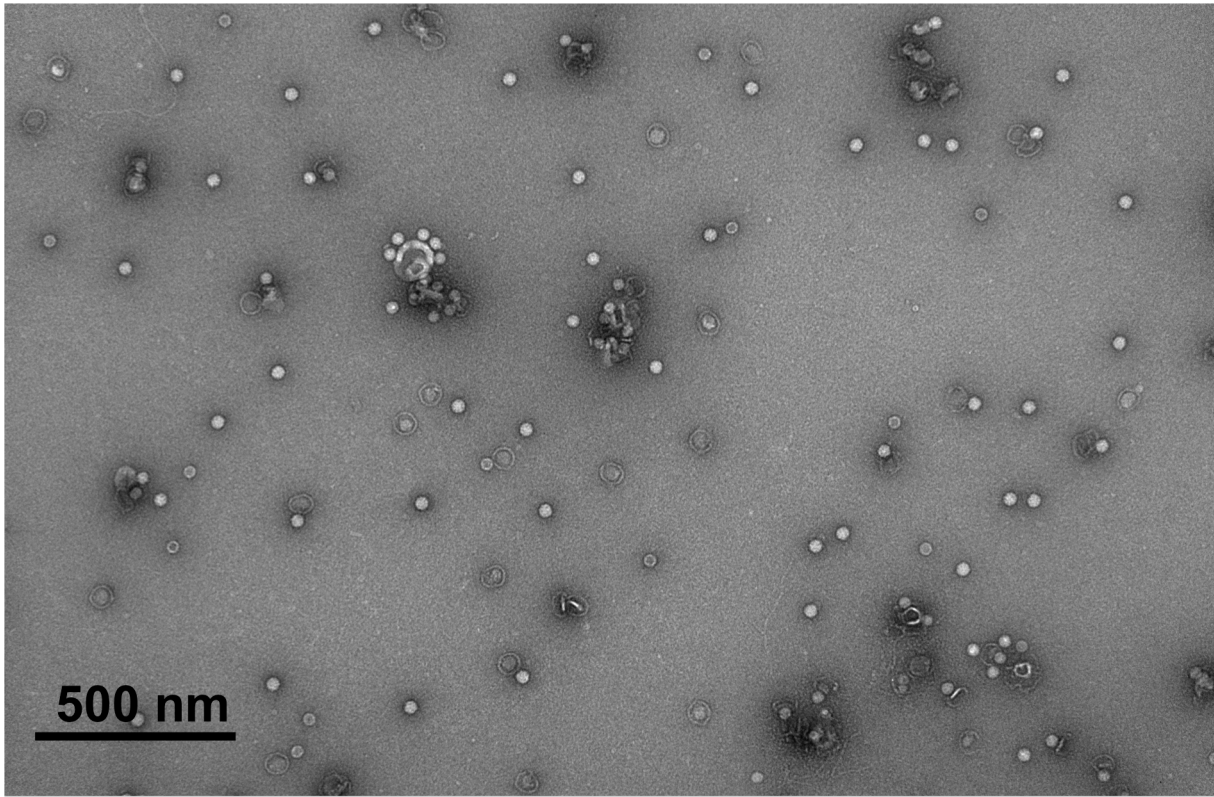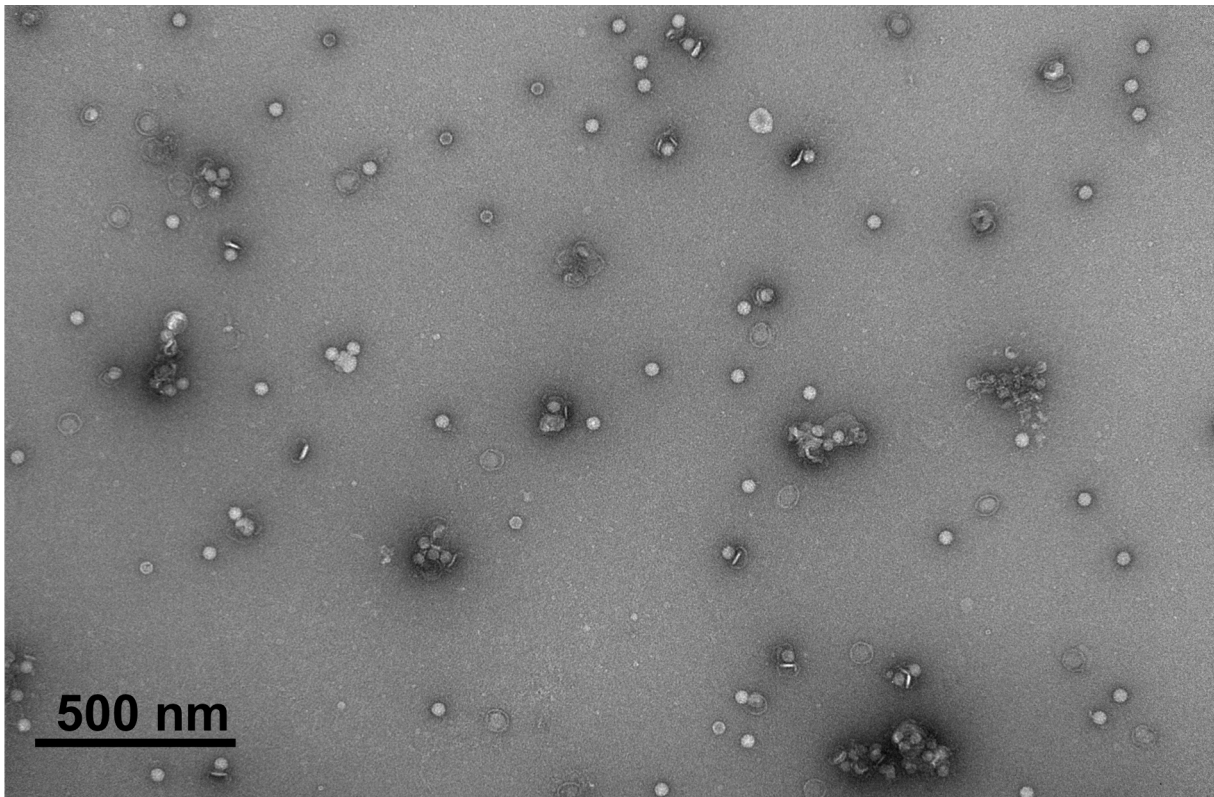

**Figure S14. TEM images showing individual viral particles tethered to 60 nm DCND.** The 60 nm DCND were prepared and stored for 6 weeks at 4°C before the incubation with the poliovirus.

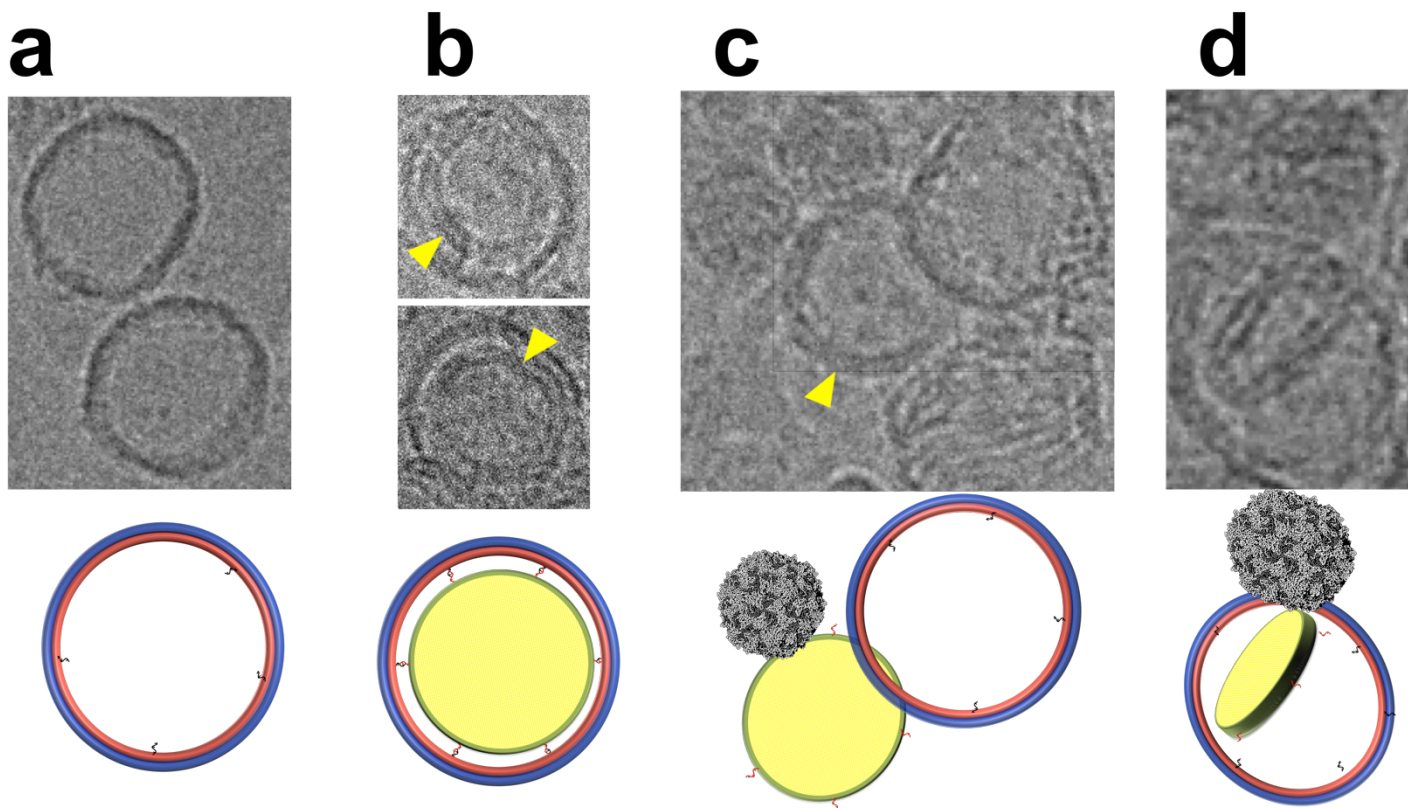

**Figure S15. Cryo-EM analysis of the 60 nm DCND with and without poliovirus. (a)** Membrane-free DNA barrel. **(b)** DCND particles. The yellow arrows point to the lipid bilayer boundaries. **(c)** Poliovirus plus DCND. The bilayer is partially separated from the DNA. **(d)** The bilayer is tilted within the DNA barrel.

### 3C-NW11 sequence

MGSSHHHHHHENLYFQGSTFSKLREQLGPVTQEFW**C**NLEKETEGLRQEMSKDLEEVKAKVQPYLD  
DFQKKWQEEMELYRQKVEPLRAELQEGARQKLHELQEKLSPLGE**C**MRDRARAHVDALRTHLAPYS  
DELRQRLAARLEALKENGGARLAEYHAKATEHLSTLSEKAKPAL**C**DLRQGLLPVLESFKVSFLSALEE  
YTKKLNTQLPGTGAAALEHHHHHH

### DNA Origami sequences

#### 90 nm DNA-origami-barrel

##### *Core staples*

Oligo0 CGTGGACCGACCAGCAGTCCTCCGTCTGATTGCCCTAAGAA  
Oligo1 CATCACTGGAGGCGAACTACGATGCGATCCGTATAATAATAA  
Oligo2 GCCAACAACCCGCTCGGTTGCCACCATGCCTGAGTTTCTG  
Oligo3 CCACGCTGAAGCGCCCTTGAGCCATCAGAGATAGAACAGTG  
Oligo4 GAAGTATTACGGTTAACCCTTGACTTGAGAGCCAGGATTTA  
Oligo5 ACTTCTGCCGCTCGTCACTGGGCACATAGACTTTAATTAT  
Oligo6 CGAATTAGTGGTTGAGCCGACGTACGGAATAATGGAAGAGG  
Oligo7 CATAGCGTGCCAGATTCCGTGCGGTATTCATTTTCATGAAAA  
Oligo8 CTTCTGACCGAGTCTGCTGCTAGCACCGATAGCTTAGTTCAT  
Oligo9 ACATGTAGCGCACATGGAGCACAGAAGCCTAAATTTGCGCA  
Oligo10 CAATCAACAACCCGCGACGCGTGTCAATTTAGGCAAGAAAC  
Oligo11 CTTGCGGTGCCGTTATTTGCTGCCAATTAATCGGCTCCCGA  
Oligo12 TAGCAGCGCGCTCGCCTCATGTGCCAGGAGGTTTTGAAAAA  
Oligo13 GAAAAGTCTGGATGGGCTCAGTTCGCACTTTACAGATTTTAA  
Oligo14 TCACAATAGTGCCGGAGTCTAGCTCTAAGCAGATATTTTG  
Oligo15 CGGAAACCAGCAGACACAACGCCGCGCAATAGAAAAAGGC  
Oligo16 CACCCTCTAGGTAGTCTCAAAGAGAGTCAACCAATAGCCGC  
Oligo17 ATACATGTGCGGGCGGGACAGGTCACCAGAACCGCCGCGTC  
Oligo18 CCAGGCGTGCAGGCACACAAGCCTTCGGCTTTTGATCAGTA  
Oligo19 GTACAAAGCGATTGGAAGCTCGTACTGGATAAGTGCTACCA  
Oligo20 CGTTGAACGTGCCGGGCGGTTGTCCCGCTACAACGCTTTCA  
Oligo21 GATCGTCTCCTGAAAAATGGGCGCTCAAATCTCCAATGCGG  
Oligo22 ATACCAATCAGGATCGAAGGTGTAGGGACCCTCAGCGCGATT  
Oligo23 TCATCAAGCCCCGAGGAGGTGAGTTCGCGCGCGAAACGACCT  
Oligo24 CCAGTCATGAACCGCAGCGTCGACCATGAGTAATCTTTATA  
Oligo25 ACCAAAAGTCTTCCGGCGCGTACCTCGGGACGTTGGATAAAA  
Oligo26 TCAGAAGCATCGGGCCACAATGTCCAGTAGCGAGAGTATAG  
Oligo27 TATAATGATCGCGTCAATCCTCTCCAGCAAAGCGGACTGAA  
Oligo28 TACTAATTACGGAGGACGGCGTATTGCCTGTAGCTCCAATTC  
Oligo29 AAATGCAGCTCCAACCCGCCAGCCCGGAGTAGTAGCATTTT  
Oligo30 ATGAACGAGGTTGCTCGATAGACGTCATGCCTGAGAATCG  
Oligo31 GGCCTTCACTAGGGTTTGGATGCGTGTAATCGTAGCGTCT  
Oligo32 CCAGCTTCAAACGTCGTTGGGCCGCGCCTGTAGCCATCCAG  
Oligo33 ACGGCCATGGAGGAGGCACGAGGCGCATCCGGCACCAAACG  
Oligo34 GGAAGCACTCAGAAGACGCACTTTGTCGTGCCAAGCCGAGCC  
Oligo35 AACAGCTAGTACCGGTAGCCGCGCGCCTAAAGTGTACGGGC  
Oligo36 GTTTGGACTCGGGCCTGCAACCGATAATCCTGGCCCTTCCA  
Oligo37 TTGTAGCGGTGGTAGGCCACTCGCTGAACCTCGTTAACCG  
Oligo38 ACACGACGGCGAGATGGGTGACGGGAAACTCAAACAGTC  
Oligo39 GGTCACTCTTGTCTCTTGAGCTACGCAGACCTGAGAGGC  
Oligo40 CCGTCAAGCTCTCGGCAGTCGGCGTTTATTGAAAAATTAGAG  
Oligo41 ATCAATAGTGGGCACGGGTTGGGCCAGTATTCGACAAATTC  
Oligo42 GAATACCGGTTTCATCAGCGCTGGGTGGTAGAACCTAGCTTT  
Oligo43 TAATTAAGCTGAACTGGGTCTGCATAAAAAGAGCAAACGCTAT  
Oligo44 TTTTCAGTGGAACCTGCGCCCGCGTATTCGCTGAGAAAAC  
Oligo45 ATTGAGAACTCGCCAGCAGTGTGACTAATGAAATAGCTTA  
Oligo46 TCCCATCTTACAACGCCGCGACTCCCATTTTCGAGATAATA  
Oligo47 AACGCGATGTCTCCTGCATAGGTCGTCTTATCTACTAAG  
Oligo48 GATTTTTGGGTTGTTGGGTATGGGTCCGGAATCAAGAAAC  
Oligo49 CAATAGCTCACGAAATCTCGGCCGACTGACATAAAAAATAG

Oligo50 CAAAGACGTGAGACCGGGCCTTGCGCGTAAAAGTTAAAACG  
Oligo51 ACCAGTACGTGGCCGACGCTACGGAGAAGTGGTTAAAATC  
Oligo52 CACCACCCTGATCCAGCGGGAGTCTGCGCTCGATAGCAGAGC  
Oligo53 TCTCTGAGGAGCGTGGCCCTTGTCTACGGGAGCCACCGCAG  
Oligo54 GATTAGGTGCAAGTCTGCTGCGGCTGATGAGTGTAAGAAG  
Oligo55 CATGTACGATTCTGTCTTCAAACGTATAGGGTTGGGAACC  
Oligo56 TAAAGGAATCACGGCTGGTGCAGCGCCGATTCCACACAAC  
Oligo57 TTGCAGGCCTCCCAGTGGGTGCCTAAGATGCTCCAAGAGGC  
Oligo58 TAAAACAGCGAGCACGCTACCAACCGAGAGACAGCAATACAC  
Oligo59 ACAGACCTTTCACGGCCTAAGTGGCACCTAACGGAGGGTGT  
Oligo60 TATGCGATCCACCGCCCGTTACGTGGAGAACCGGATACCT  
Oligo61 ATAACCCGTGTCGCCGATGGACTGACTTAATCTACACTATC  
Oligo62 AAATCAGGCCATTACGCTGTCACTTGGTCCAAAAGAATCAA  
Oligo63 TCGCGATGGACTTGTTCAGTGGGCATTGTA AAAAAGAATTTT  
Oligo64 GGGCGCGGAGCGGGCTCGGTCAATGGTGGTTTTAAATCATTTG  
Oligo65 TAAAAATGCCCTCTATTCAAGGCGGACAGTCCAATAAAGGA  
Oligo66 CTGAGAGTGCCACAATCCTCGCGACGCTTTAGGTAAATTGC  
Oligo67 TAGGAACGTGAAGCCGCATTCCCTGGCTCCATGTCAAACCAA  
Oligo68 GTATCGGTAAGCTCATGCAGGTCGAGGCTAACATCGACA  
Oligo69 GGTTTTCTGTCGGTAGGCCACGCGCTACCGTGCCGGGCCAG  
Oligo70 CCGCTCACAGTCTGCTGCTCGCAGCCCCCTGCAGTGTAT  
Oligo71 TGGTTTTACACGGTCCGGTCAATCTTCCAGGGTGCCAGGG  
Oligo72 AGCCCCAATTCTCCGCCCCAGGCCCGGTGTTGCAGAGAAT  
Oligo73 AAAGAGTAAGCCTGAGCGAGCCTGTGTGAAGAGCGGCGAGTA  
Oligo74 GATTATTAGACCCACAAATCCCACGCGCTCTTGCTGAAAATG  
Oligo75 ACCAGCAGCAGCAGAGTTGAGGCGAACTAAGAATACGAACC  
Oligo76 TTAGGAGAGCTACACATCGCACCCGACGACATCACCATATCT  
Oligo77 TATTCCTGCCGACAGTAAGCGTCTGTCAATAAATCCATCA  
Oligo78 AAACAATGGACTCCTCAGGAGCTGCCGAAAAAATTAGGGAG  
Oligo79 AATAACCACGTTGGCTCGGCTTTCGAGAAGATGAAATGAGTG  
Oligo80 CAATCGCGATATTTCTGAGTGCAGGTTAATAGTGAAATC  
Oligo81 ATAAAGCGATTGGGCCACCCGGTGCCGAATGTGATACCAGT  
Oligo82 ATAGATACGACATCGAGTGTGCGCTGCATAAGAGATCAACA  
Oligo83 GATATAGGTGTCCGCGCGTCACCATCCAGAACGGGTAATCA  
Oligo84 TATTATTCCTGGTCCGCTTCTCAAGCAATGCTATTAGCCA  
Oligo85 CAATAATCGCAAGTATCCCGTCCCAACTAAAGCGCATAAGCC  
Oligo86 CATAAAGTTTCATGACAGTTTCGTTAGCAAGAAACCGACATA  
Oligo87 GCCATTTAGTCTGACGCGGAGTTCGGTCAAAGACCTTGA  
Oligo88 TTTCATAGGAAACGCCGTCCGGCGGTCCGGGTAATCACCATCT  
Oligo89 CCTCATTCGATGTGAACACATGCAACCATAGAGCCGTAAT  
Oligo90 ATTAAGATCGTCCGACGTCGCTCCAGAAATAAGTTTAAAGT  
Oligo91 TTTTCAGGCTGGTTTTACAGGTGCGAGGTATAGCCCCCTCA  
Oligo92 TCAGCGGCTGTATGGACGCCATCTGGGCCTCATAACAGTT  
Oligo93 GCATAACACCCGGTTATTTCTAGCGCAGCTTTAATCCCAC  
Oligo94 ACCTAAAGGTGGAACCCCGTTCGCGCGCGGAGGGTAGCACCA  
Oligo95 AACTTTGAGACAAGCGCCCTCGAGCACACTCATCGTGACC  
Oligo96 ATTTCAAGCTTGACGTGTTGCAGCTAGAATACCCAAGTTTA  
Oligo97 ATTACGAGGGTGTCTGCATCCAGTTGCCTAAACGAAAAAGGA  
Oligo98 TTCAGAAGTGGCATGGGAAAGGGCTGCGGCCAGGAAACAG  
Oligo99 AATTGCTTAGAGGGCGGACGGTGATGGAAGAAGCCCCCTT  
Oligo100 CAATAACGGGTGTGGCGGGAGGTTTCGTCTAAAGTAAATGGT  
Oligo101 CGGGAGAGCTAAGGCGAGCATACTCCTCTCAGGCAATTTTG  
Oligo102 GAGATCTGAGGCGGCCACGGCCAGTAGAGAAAGGGTTTTGA  
Oligo103 TTTTGTGTACGTCTTAGGCTTCCCATACGTACCCCTTAAAT  
Oligo104 GCATCTGCCATAGTACACGTGGGTCAACAAGAGCGAGACCGT  
Oligo105 TGCAAGGACCATGCACCCAAGGACACTCCGCAAAGCTGTGC  
Oligo106 TCATAGCGCTTACTGCCGGGCGGCCCGCTAGACCTCATGG  
Oligo107 AGAGGCGACCGGTATCACTGTTTACGCTTGTGAGCTACGGG  
Oligo108 CGGCAAACGCCTAGGTTATGAAGCCCAATTCCACGCGAAAT  
Oligo109 TGTTTTTACATGGGCAGGCGGTGCCTGATACAGGAGGAGAAG  
Oligo110 TACATTTTGTGCTCTTGGCACC GCCGATCCAGAACATACC  
Oligo111 ACATCGCATGCCAACGTTCTGTGGAACCTGAGACAATCTAAA  
Oligo112 AGGAATTCAGTCTGCTCAGTCGCGCTTCCAACCTCAAGTTGAA  
Oligo113 AACCACCAAGCTAGTTCGCAAATCAGACGAACGTAAGA  
Oligo114 TACAGTACTGCTGAGAAGCGGCGGCTAAGGTA AAAACGAATA  
Oligo115 AAACAGTATGCGGAGAAGGAGGCAAGAACCAAGAAATAATGG  
Oligo116 ATA ACTATCCGGAGAGGTGGGCGGCTTACAAAATCGTTAT  
Oligo117 TCATATGGGTGACAATGTCTGGTGCATACGTTAAATAGTA

Oligo118 GCTAATGCTGGTGGCTGCTTGACGCGCCGGTACCGATGTTCA  
Oligo119 CATTACCCCTCGAGCTGAGTGCAGTTCACAAGTACGGAAT  
Oligo120 TAATTTGCGAATGGCTGCATCCGCGCTGCCAGCTACGAGCC  
Oligo121 AGAGATAACACTTTCCCTCAGGACGTACCGGAGAATTATCAG  
Oligo122 AGTATGTGCAGCCATGCCGAACGACCGCAATAATACGC  
Oligo123 AAGGTGACTCCATGGCTCCAGGATAGCTACGACATTCATTA  
Oligo124 TCATAGCCGGCGGGCTTGCGGATTAGATCAGAATCTTTTCGG  
Oligo125 TTGGCCTGTGTCCCACCACTTCGTATGCCAACCACCGACGA  
Oligo126 CGGAACCACAAAGTAGCCACCGCTCCTGGTCAGTGTATTT  
Oligo127 GAACCGCCAAGTCCCGGTCTGAAGGCGTAGGTGTATCCCTCA  
Oligo128 GGGATTTTGGCGAGGAATTCCTACGACCATAACGATTGTAT  
Oligo129 CGCCGACTCCCAGACCCCGGCAGGGATGGTTTATCAGTTG  
Oligo130 AAAATACGCGCGTGTGACAAGACCTAAACTACAGAACGGGT  
Oligo131 CGGTCAAGAGGCCAGCAGTGTGATGAGGTATTGTGTGCAGA  
Oligo132 GAGTAGTACCGAGCGATACCAGAAAGCTCTAACAAAAGAAC  
Oligo133 AACTAATGATGGCCGCGCTCAGGACCGAAAACAACAACATTC  
Oligo134 ATTGAATCACTTAACAATGGCGCTTCTGCAGTAAAATATTC  
Oligo135 CCAACAGGCTGGTCACCGTCGAGCGGACCTTCAAATAAACT  
Oligo136 TTTGACCTAACGGCCGGCCTGGTTAGCGTTGGAAGTATTTAG  
Oligo137 AAAAAACAATACCGGGTCCCAAATCCCAATAATTAGCGTACC  
Oligo138 TTAATGCTCCTGTCCGACGTCTGTTGCTTGCCGGAGATAAA  
Oligo139 GTTAATAACGAATCCGCCGGGTGGGACCGAATCAGAGTAAAC  
Oligo140 GTTGGTGTACCTGGCATGACGCAGGCCTTCCGTCGGGTCAC  
Oligo141 TTACGCCACGGTGGCGTTCCTGGACATAGCCATTCGGCTA  
Oligo142 CGGGTACCTAGGTACGGTCGGCCTTGAAGGCGAGGCGATCCC  
Oligo143 TGCATTAGCAGAGACCCGCTATGGACGTTAATTGCCAGC  
Oligo144 AAAATCCCAGAGTTGGGGCTCCTTCCGTCCCCAGCAGGCG  
Oligo145 ACAGGAACTTGTTACCTCGGCACGTCTGAAAGGGATTTTAG  
Oligo146 GCAACAGCGCCCGGCCGACGATTGCCGCCGCCAGCCATT  
Oligo147 TCTTTAAGAGCGCTTTACGAGTTGGCTGAAATGGCTATTAG  
Oligo148 ATCTGGTGCATTGGGCAGCCAAGTATATGACCCTCAATCAAT  
Oligo149 AGTAACAGCGGTTGCCGAGGCTGGCATTAAAAGTTTG  
Oligo150 AGATTTTGCACCCACATTAAGAGCTTTTTAAGAAATTGCGT  
Oligo151 CAATTTCCGCCTGACCCGCGAGATCCGCATAATTACATTTAA  
Oligo152 TTTTTAATGAGCTCGGGGCTACATGGAATTGAGAGACTACC  
Oligo153 CATAATTGGATCGGGCGGTGCACTGTCCCAAACACCGGAAT  
Oligo154 TCCAGACCCGGTGCACACCCAATAGACTAAAGTAATTCTG  
Oligo155 CAAGCCGATGGACCAGGCCGAGCTAGTGAATCGAGAACAAG  
Oligo156 CCAACGCCATGGCCACTGCTAAGTGAGTTTCCCTGAATCTTA  
Oligo157 AGTCAGATAGCCATCCGGCGTACGTTTTAACACCCTGAACAA  
Oligo158 ACTGGCACTATGTCGGATCCCGCGAGGGGATACCCAAAAGA  
Oligo159 AGGTAAATGCTGGGTTAGCTCAGCGGGTGTGAGGGAGGGA  
Oligo160 ACTGTAGTCAGACGCTCACCTGGACGTACCTTTAGCGTCAG  
Oligo161 TTGACAGGATTGTCAGGGCACCGCTAGCGCCGCCGCGCAGCA  
Oligo162 TATAAACACGTGGGACCCCTTCGACCGATAACAGTGCCCG  
Oligo163 GTACCGCCACGAGCACTACCGACGTCAGCTCAGGAGGTTTA  
Oligo164 CCAGACGCTGGATACCCACATGTGCAGCATTTGTCTCTTT  
Oligo165 TTTCTTAATCCAACACAGGCGCGGAGGTTTTTCGAGGTGAA  
Oligo166 TTTTCATGGACAAACGTGCAACAGCAGAAAGGACTAAAGACT  
Oligo167 CATGTTAATGTGCGCCTGTCCGGTGTATGACGCGACCTGCTC  
Oligo168 AGGCTTGAGCGCAGACACGCCTCCACGCTATTCAGTGAATA  
Oligo169 CATCAGTACGCGATTAACAGGCAAGAGCCAGGTAGAAAGATT  
Oligo170 CCAATACGTCGTGCTGTCGCGCCGACTGACTGGATAGCGT  
Oligo171 TTCAAAGGAGTGCGCCGTATGTTCTGGTGTAAATTCGAGC  
Oligo172 ATTCCCACGTTGCCCGGGCACGTGACTCGCATATAACAGTTG  
Oligo173 TCAGAGCTCAGGTCCTTGGTGCCATAGGATAGCAATAAAGCC  
Oligo174 TATGATATCAGGCAAAAACGAACATCCGATAATCACCATCAA  
Oligo175 ATTGTATGCTCTGAGAGGCGTCCCGGTTTCAAAAACAGGAAG  
Oligo176 GCGGATTTTCGGACACACTTTGCCGCAAGTGGGAACAAC  
Oligo177 AAGGGCGGGCTAGCCCGGCGAGCAGTTGGCAACTGTTGGG  
Oligo178 ACGCATGCTATTGCCACCGTCTCCTGTATCTAGCGACCGTAT  
Oligo179 TTTCCAGTGTCCGGCCTCCCGTATTGGCCTCACTGCCCGC  
Oligo180 GAGTCCACTATTATCACCCTTTTACCAGTGAGAAAGCCTGAT  
Oligo181 AATAAAAAGGACAAGAAGAATACTTCTTTGATTAGCGTGCTTAA  
Oligo182 TAATACATTTGAGCAGCAATAACACCGCCTGCAACCCTTCTGT  
Oligo183 TACAAAATCGCGCAGGGTTAATCCTGATTGTTTGGCAAACAAGA  
Oligo184 TATTTTAGTTAATATTAAGATTCCCTTAGAATCCTATTACCTGT  
Oligo185 TTTACGAGCATGTGAGGCATCGCCATATTAACAAAATGGTTTA

Oligo186 TAACGTCAAAAATAAGCCTTCGTTTTAGCGAACCTGTCTTTCAA  
Oligo187 CGGAATAAGTTTAGCCGAACCTTACCGAAGCCCTGAGAATATT  
Oligo188 CCGCCTCCCTCAGGAAACCAACCATTACCATTAGCATTACATA  
Oligo189 GCGGGGTTTTGCTGATACAGTTACCGTTCCAGTAAACCCTCAA  
Oligo190 CGAATAATAATTTCTGTAGCTAACACTGAGTTTCGCGTCGAGTA  
Oligo191 TCTTTGACCCCAAGCGAAAGTTAAAGGCCGCTTTAAAAAAGTG  
Oligo192 AAGAAGTGGCTCATGACAAGGCGCATAGGCTGGCTAAAGTACCA  
Oligo193 TTACCCTGACTATGCTTTTTGGTTTACCAGACGACGGAAGAAATT  
Oligo194 GAAAAGGTGGCATAACATGTCTTAGAGCTTAATTGTTGCATCCT  
Oligo195 GAGCAAACAAGAGTAATGTGTTAGAACCCTCATATATTAACACT  
Oligo196 AGGAAGATCGCACGCTTTCACATCAAAAATAATTCAAACCTAGTG  
Oligo197 TCCACACAACATTTGCATGAGTCACGACGTTGTAGCTTCTGTC  
Oligo198 CCATCACGCAAATTAGAATCTAGGGTTGAGTGTGTGAGAGATT  
Oligo199 ATAAAAACAGAGGTAAGCGTACATTGGCAGATTCACTATCGGCGT  
Oligo200 ATCAGATGATGGCACTCGTACTAACAATAATAGATCTAAAGAG  
Oligo201 TTCTGTAATCGTAGAAGATCGGATTCGCCTGATCCATATCTT  
Oligo202 GCTCAACAGTAGGCCGACCGGACAAAGAACGCGAGAAGAGTCCG  
Oligo203 CTTATCCGGTATTTTCCAAGTCTGAACAAGAAAACAGTAAAC  
Oligo204 GCAAGAAACAATGAACAGGGTCCCAATAAAGATTAGTGG  
Oligo205 ATTAGAGCCAGCACCCAGCGCGGCAACATATAAAAAGCCAGAAGGA  
Oligo206 CCAGAATGGAAAGCACCTCCAAAATCACCGAACCAGCACCGA  
Oligo207 AGCAAGCCCAATAATATAAGCTGAGACTCCTCAAGCTGGTAAAG  
Oligo208 ATATTCGGTCTGTAAGGAGCTGAGAATAGAAAGGAAGACAGCAT  
Oligo209 AGGACAGATGAACATTTGTAGAAAGAGGCAAAAGATCGGAACAT  
Oligo210 TAGTAAGAGCAACGTTAATATTAATCATTGTGAATTATTCATAG  
Oligo211 TTGATAAGAGGCTTAAGAGCGAGAATGACCATAAAGTTTGGCA  
Oligo212 TTTATTTCAACGCAATCATAGTTTAGCTATATTTTTATGCAACTT  
Oligo213 CAGCTCATTTTTTATCATATAAAGGCTATCAGGTCAGATTCACC  
Oligo214 TAAGTTGGGTAACAAACCAGAGTTTGAGGGGACGATAAATGTAT  
Oligo215 GCGTATTGGGCGCTAATGAGTTTCTGTGTGAAATGTCGACTAT  
Oligo216 CTTATAAATCAAACAAGCGGAATCGGCCAACGCGACTCACAAAG  
Oligo217 GCTCAATCGTCTGGTAATATAATCAGTGAGGCCACGAGCTAACC  
Oligo218 AAGGTTACTAAATTTGCTGATTAATAAATACCGAACGTGGCACAC  
Oligo219 TACCTTTTACATCTTTGCACAAGGAGCGGAATTATCTTTGCCGG  
Oligo220 TAAATGCTGATGCAATTTATATAAATCAATATATGCAAACATAG  
Oligo221 ACGCGCCTGTTAATATAAATTATACAAATTTCTTAAATAAGGTG  
Oligo222 TTACAAAATAAACTTGCACCGCCCAATAGCAAGCAATTAACGA  
Oligo223 AAACGTAGAAAATAGGAAACCCACAAGAATTGAGTTTAGACGAG  
Oligo224 TTATTAGCGTTTGGTAGCGATATCACCGTCACCGAAAAAGGGGC  
Oligo225 ATTCTGAAACATGTAACGGGATATTCACAAACAACCACCAGCC  
Oligo226 AAACAACCTTCAAGTTAGCGCCCTCAGAGCCACCACGGAATATT  
Oligo227 TGCCACTACGAAGGCAACGGTGACAACAACCATCGTGTATCGCT  
Oligo228 TGGGCTTGAGATGATCAACGATAAGGGAACCGAACCTGATAAAA  
Oligo229 CTCAAATGCTTTAGGGTAATAGATACATAACGCCACTAACGGAT  
Oligo230 GATACATTTTCGCACGGTGTCCAGGATTAGAGAGTAGAAAGACCC  
Oligo231 GAGGGTAGCTATTGAGAAAGATGACCCTGTAATACGGCAAAGTA  
Oligo232 TGGGCGCATCGTATAACAACCTGTTAAAATTCGCAGGTTGATGA  
Oligo233 CTCGAATTCGTAATTTGATACTGGCGAAAGGGGAGCCATTCTGA  
Oligo234 ACGCCAGAATCCTGCCGATTTTTGATGGTGGTTCTGGTTTGGG  
Oligo235 CGAACTGATAGCCATTTTTGAAAACGCTCATGGAAAATATTAGT  
Oligo236 CATTTTGCGGAACCTATTAATGTTGGCAAATCAACAATATCAACG  
Oligo237 GAATTACCTTTTTACAAAATGGTTAACGTCAGATAGAAATAAT  
Oligo238 GAAAAAGCCTGTTAAGAATTCGGGCTTAGGTTGGATAGGTCTT  
Oligo239 TATTTTCATCGTACGCACTCCGACAATAAAACAACACAAAAGGTA  
Oligo240 AATTGAGCGCTAATAACTGAACGAGCGTCTTTCCAAATTTTATT  
Oligo241 GACGGAAATTTCAACCCGAATTAAGACTCCTTATAACGGAGT  
Oligo242 TTGAGGCAGTTCAACCCAGAGCGTTTTTCATCGGCATAAGTTTGT  
Oligo243 CTCAGAACCGCCACACCGTATTAATGCCCCCTGCCCTTGAGGG  
Oligo244 GCTTGATACCGATAGCTTGCAGTAAATGAATTTTCTAAAGTCC  
Oligo245 GCCGGAACGAGGCCGAAATCGGAAGTTCCATTAAGGCTTTGCA  
Oligo246 ATTTAGGAATACCTTATTACCTGACGAGAAACACCGCTGCTCTA  
Oligo247 CCAGACCGGAAGCATCGCGTCGGAATCGTCATAAATGTTTAGAG  
Oligo248 AGCTAAATCGGTTAAATTAATCTGCGAACGAGTAGTTCATTCAA  
Oligo249 AAATATTTAAATTAAGCCCAACCGTTCTAGCTGACAGTCAAAA  
Oligo250 GTGCGGGCCTCTTAGGCTGCACCGTAATGGGATAGATTCTCCGC  
Oligo251 GAAACCTGTGCTGCGTTGCGTAGTACCCGTATAAGAAGTCCGCG

*Short inner scaffolds*

Oligo252 TTGTGGGTCTGTTTCGCCTCAACTCTGCTGCGTCGGTGCGA  
 Oligo253 TGTGTAGGCTACAGACGCTTACTGTCCGGCCGCGCAGCTCC  
 Oligo254 TGAGGAGTCCCTCGAAAGCCGAGCCAACGTCCTCGCACTC  
 Oligo255 AGGAAATATCCGGCACCGGGTGGCCCAATCCAGCGCAACA  
 Oligo256 CTCGATGTCCGGATGGTGACGCGCGGACACGCTTGAGAAG  
 Oligo257 CGCGACCAGGGTTGGGACGGGATACTTGC GGCTAACGAAC  
 Oligo258 TGTCATGAAACGAACTCCGCGTCACGACTGGGACCGCCGA  
 Oligo259 CGGCGTTTCCGGTTGCATGTGTTACATCGCTGGACGGAC  
 Oligo260 GTCGCAGCGATCGCACCTGTGAAACCATGCCAAGATGGCG  
 Oligo261 TCCATGACAGGCGCTAGAAATAACCCGGGTGCGCGGAACG  
 Oligo262 GGGTTCCACCGTGCTCGAGGGCGCTTGTCTCTAGCTGCAA  
 Oligo263 CACGTCAAAGCGCAACTGGATGCAGACACCCGACGCCCTTT  
 Oligo264 CCCATGCCACCCATCACCGTCCGCCCTCTAACGAACCTCC  
 Oligo265 CGCCACACCCAGGAGTATGCTCGCCTTAGCCTACTGGCCG  
 Oligo266 TGGCCGCTCATGGGAAGCCTAAGACGTACGTGACCCACG  
 Oligo267 TGTACTATGGAGTGTCTTGGGTGCATGGTGGGCCGCCCCG  
 Oligo268 GCAGTAAGGCAGCTGAACAGTGATACCGGTGCGGGCCTGG  
 Oligo269 GGCGGAGAATACACAGGCTCGCTCAGGCTTCGCGTGGGAT  
 Oligo270 CTGCCCATGTCCGGCGTGCAGAGAGACTCAGGTTCCACGA  
 Oligo271 ACGTTGGCATGAACGCCGACTGACGAGCTGTGATTTGCG  
 Oligo272 ACACTTCGCTTAGCCGCCGCTTCTCAGCAGTCTTGCCCTCC  
 Oligo273 TTCTCCGCATAAGCCGCCACCTCTCCGGATCGCACCAGA  
 Oligo274 CATTGTCACCGCGCGTCAAGCAGCCACCAGAACTCGCACT  
 Oligo275 CAGCTCGAGGAGCGCGGATGCAGCCATTTCGTACGTCTGA  
 Oligo276 GGGAAAGTGTCCGGTCTCGGCATGGCTGCGCTATCCTGG  
 Oligo277 AGCCATGGAGCTAATCCGCCAAGCCCGCCGATACGAAGT  
 Oligo278 GGTGGGACAGCGGACGCGGTGGCTACTTTGTCCGCTTCAGA  
 Oligo279 CCGGGACTTGGTCTAGGAATTCTCGCCATCCCTGCCGG  
 Oligo280 GGTGGCGGGATAGGTCTTGTGACACGCGCCTCATCACAC  
 Oligo281 TGCTGGCCTCGCTTTCTGGTATCGCTCGGTCCGTCTGAG  
 Oligo282 CGCGGCCATCAGAAGCGCCATTGTTAAGTGTCCGCTCGAC  
 Oligo283 GGTGACCAGCGCTAACCAGGCCGGCCGTTATGGGATTTGG  
 Oligo284 GACCCGGTATGCAACAGACGTCGGACAGGAGTCCCACCCG  
 Oligo285 GCGGATTCGTGGCCTGCGTCATGCCAGGTATGTCCAGGGA  
 Oligo286 ACGCCACCGTTCAAGGCCGACCGTACCTAGTCCATAGCGG  
 Oligo287 GTCTCTGTGCTGGGCTTATAACCTAGGCGCAGGCACCGC  
 Oligo288 GGGCCGGGCGAGCCAACCTCGTAAAGCGCTCTATACTTGGC  
 Oligo289 TGCCAATGCCAGGCTCCAGGCAACCGCAAAGCTCTTA  
 Oligo290 ATGTGGTGTCCGGATCTCGCGGGTCAAGCGTCCATGTAGC  
 Oligo291 CCCGAGCTCAGACAGTGCACCGCCCGATCCCTATTGGGTG  
 Oligo292 TGCGCACCGGACTAGCTCGGCCTGGTCCATCTCACTTAGC  
 Oligo293 AGTGGCCATGAAACGTACGCCGGATGGCTACCTCGCGGGA  
 Oligo294 TCCGACATAGCCCGCTGAGCTAACCAGCACGTCCAGGTG  
 Oligo295 AGGCGTCTGACTAGCGGTGCCCTGACAATCGGTCCGAAGG  
 Oligo296 GGTCCCACGTGACGTGCGTAGTGCTCGTGGCTGCACATGT  
 Oligo297 GGGTATCCAGCCTCCGCGCCTGTGTTGGATCTGCTGTTGC  
 Oligo298 ACGTTTGTCCATACACCGACAGGCGCACATCGTGGAGGGC  
 Oligo299 TGTCTGCGCTCTTTCCTGTTAATCGCGTGTCCGGCGGAC  
 Oligo300 ACGACACACCCAGAACATACGGCGCACTCAGTCACGTGC  
 Oligo301 CCGGGCAACGCCATGGCACCAAGACCTGACGGATGTTTCG  
 Oligo302 TTTTGCCTGAACCGGGACGCTCTCAGAGCGCGGCAAAGT  
 Oligo303 GTGTCCGAAAACTGCTCGCCGGGCTAGCCACAGGAGACG  
 Oligo304 GTGGCAATAGCAATACGGGAGCCGCCGACACGGAAGGAGC  
 Oligo305 CCAACTGCGGGACGTGCCGAGGTAACAAGGCAATCCGTC

*Handles to hybridize with nanodisc-DNA conjugates*

Oligo306 CCGAGCGGGTTGATGGCTCAAGGGCGCTTCAAGTCAAGGGTTTTTTCTTCACACCACACTCCATCTA  
 Oligo307 GTTAACCGTATGTGCCAGTGACGAGGCGGCCGACTGCGTTTTTTCTTCACACCACACTCCATCTA  
 Oligo308 GCTCAACCACTACCGCACGGAATCTGGGCACGGTGTACGTTTTTTCTTCACACCACACTCCATCTA  
 Oligo309 ACAGACTCGGCTTCTGTGCTCCATGTGCGCTGACACGCGTTTTTTCTTCACACCACACTCCATCTA  
 Oligo310 CGGCGGGTTGATTGGCAGCAAATACCGGCACTGGCAGATGTTTTTTCTTCACACCACACTCCATCTA  
 Oligo311 AGGCGAGCGCTGCGAACTGAGCCCATCCAGAGAGCTAGGATTTTTTTCTTCACACCACACTCCATCTA  
 Oligo312 CTCCGGCACTGCGCGCGTTGTGTCTGTCTCTTTTGTATTTTTTTCTTCACACCACACTCCATCTA  
 Oligo313 GGACTACTAGGTACCTGTCCCGCCGACGAAAGGCTTGTTTTTTTCTTCACACCACACTCCATCTA  
 Oligo314 TGTCGCTGCACAGTACGAGCTTCCAATCGCCGGGACAACCTTTTTTTCTTCACACCACACTCCATCTA  
 Oligo315 GCCCGGCACGTGAGCGCCATTTTTTTCAGGACCCTACACCTTTTTTTCTTCACACCACACTCCATCTA  
 Oligo316 TCGATCCTGAGCGAACTCACCTCCTCGGGCATGGTGCAGCTTTTTTTCTTCACACCACACTCCATCTA  
 Oligo317 CTGCCGTTACAGAGTACGCGCCGGAAGACCTGGACATTGTTTTTTCTTCACACCACACTCCATCTA

Oligo318 TGGCCCGATGCTGGAGAGGATTGACGCGATGCAATACGCCTTTTTTCTTCACACCACACTCCATCTA  
 Oligo319 GTCTCCGTACCGGGCTGGCGGGTTGGAGCTGACGTCTATTTTTTCTTCACACCACACTCCATCTA  
 Oligo320 CGAGCAACCTACGCATCCAAACCCTAGTGTGGCCGGCCATTTTTTCTTCACACCACACTCCATCTA  
 Oligo321 ACGAGCTTTTGTGGCGCCTCGTGCCTCCTCCAGCAAAGTGCTTTTTTCTTCACACCACACTCCATCTA  
 Oligo322 GTCTTCTGAGGGCGCGCTACCGGTACTAGACGAGGAGATTTTTTCTTCACACCACACTCCATCTA  
 Oligo323 CTGCTGGTCTGCGCATCGTAGTTCGCTCCTGGTGGGCAATTTTTTCTTCACACCACACTCCATCTA  
 Oligo324 GCCTACCACCTCCCGTGCACCCATCTCGCCCGTAGCTCAATTTTTTCTTCACACCACACTCCATCTA  
 Oligo325 GAGAACAAGGAAACGCCGACTGCCGAGAGCCTGGCCCAACTTTTTTCTTCACACCACACTCCATCTA  
 Oligo326 CCGTGCCCAACCACCCAGCGCTGATGAACCTTATGCAGACTTTTTTCTTCACACCACACTCCATCTA  
 Oligo327 CCAGTTCAGCTACGGCGGGCGCAGTTCACAGTCACACTGTTTTTCTTCACACCACACTCCATCTA  
 Oligo328 CTGGGCGAGTGGGAGTCCGCGGTTGTGAACACGCACTATTTTTTCTTCACACCACACTCCATCTA  
 Oligo329 CAGGAGACAGGACCCATAACCCAAACCCGTCGGCCGAGTTTTTCTTCACACCACACTCCATCTA  
 Oligo330 AATTTCTGTAGCGCAAGGCCCGTCTCACTCTCCGTAGCTTTTTTCTTCACACCACACTCCATCTA  
 Oligo331 GTCGGCCACGGCAGACTCCCCTGGATCAGGTAGACAAGGTTTTTCTTCACACCACACTCCATCTA  
 Oligo332 GGCACGCTCCAGGCCGACAGACTTCGAACGTTTGAAGTTTTTCTTCACACCACACTCCATCTA  
 Oligo333 GACAGGAATCGCGCTCGCACCAGCCGTGATCTTAGGCACCTTTTTTCTTCACACCACACTCCATCTA  
 Oligo334 CACTGGGAGGTGGTGGTAGCGTGTGCGGTGCCACTTTTTTCTTCACACCACACTCCATCTA  
 Oligo335 GGCCGTGAAACCACGTAACGGGCCGGTGGAGTCACTCCATTTTTTCTTCACACCACACTCCATCTA  
 Oligo336 CGGCGCACACCAAGTGACAGCGTAATGGCAATGCCACTTTTTTCTTCACACCACACTCCATCTA  
 Oligo337 GAACAAGTCCACCATTGACCGAGCCCGTCTCGCCCTTGTTTTTTCTTCACACCACACTCCATCTA  
 Oligo338 AATAGAGGGCGCGTTCGCGAGGATTGTGGCAGCCAGGGAATTTTTTCTTCACACCACACTCCATCTA  
 Oligo339 GCGGCTTCACCTCGACCTGCATGAGCTTACTAGCGCGTGGTTTTTCTTCACACCACACTCCATCTA  
 Oligo340 CCTACGGCACGCTGCGAGCAGGCAGGACTGGAAGATTGACTTTTTTCTTCACACCACACTCCATCTA  
 Oligo341 CCGACCGTGTATCGGTTGCAGGCCGAGTCAGCGAGTGTTTTTTCTTCACACCACACTCCATCTA

## 60 nm DNA-origami-barrel

### Core staples

Oligo0 ACGTGGACGGGACTGCGCGAGGGTAGGACCAGCTGCAAAAAGA  
 Oligo1 GTGGCACAGTGGGCACACTCGAGAACTCCCGTTGTAATAC  
 Oligo2 GAGACTAACGGCCCCGAATTGAGGGCAAGACAATATTTTAG  
 Oligo3 CATATCACTGAGGATATGAGACGATGACAACATAATCCTAC  
 Oligo4 ATGTGAGTCCAGTCGCCCCCGCAGTTGAAATATTTAATAT  
 Oligo5 TGTTTTGATCTGGGTAGCAGCGGTAGGAATAACCTTTTAA  
 Oligo6 AGAACGCGTTGCCACGAGTGCGGTGATAAATACCGAAATGC  
 Oligo7 GGGAGGTATCCCGGACCACATATATCCCTGTTTATCTTGC  
 Oligo8 ATCAGAGACTGTGGCCGCGCACCCGCCCTTGAAGCCCTAAT  
 Oligo9 TTATTTGAGGCGACGGCTATTGACCGATAACCCATAAGT  
 Oligo10 TTTTCATCGCTAGCGTTCTAAGTCGGGTGTCACAATCCGCGT  
 Oligo11 TTTACCGTGTAATGCGCGGCCGAGGGCATTTCGCTGAA  
 Oligo12 AGTACCGCTGCTGGACCGTGGACCAAGGTTCCAGTAAGGTTT  
 Oligo13 ACAACTATGAGGGTACGGGACCATGGCACCCCTCAGAAGGA  
 Oligo14 GAGGACTAGGAGTTGTGCCAATGGCGAGAAGGAATTGGCTTT  
 Oligo15 AGGACAGGCACTGGGCGCCTTGTCAAAGACTTTTGAAAG  
 Oligo16 AACAACTAGCTAGTCGGACGTCGACTATGAACGGTAACGG  
 Oligo17 AGTTCAGCGCAACGGGACGCACAGCATATTACAGGTAAAC  
 Oligo18 AAAGTACGCGAGGGTAGGGCCTAACTCAAAAACGAGACAACCT  
 Oligo19 CCTGTAAGCGTCTAGGGACTCGGCACGTGTCTGGAATGAC  
 Oligo20 TGTCAATCGCGGTGGCCGACTGGCCATACTTTTGCTAGCA  
 Oligo21 TTGGTGTTAATCTGTGGATAATCCGAATATGTACCTCACG  
 Oligo22 AAGCTTGCCGGCTCAAGGCCTCGCGCAAGATGGGCGGTGCC  
 Oligo23 TGTCGTGGGCCAAGACGTAGCGCATGATGCCTGCAAAAACC  
 Oligo24 CAGTTTGGCCGGAGACCCAGGGATAAGCCCTCGGCCATGTTT  
 Oligo25 ACCCTTCGAGGTTGAGGGCGCAGATGAACTTCTTTATAGA  
 Oligo26 ATTGAGGAGCGGCTGCGTACGTTTCGAGCTGGGCTATTAAGGA  
 Oligo27 TTCTGAAATGCCGCTTCTCCAGTGTAGAGCCGTCTATAC  
 Oligo28 TTTAATGTACTACCCGAGGACGGAGCTTAAACAGAAACCTT  
 Oligo29 GTTAATTCGTTCCCTGCGCGCTTGTAGTAAATCTTTTA  
 Oligo30 ACGACAATCACACACGCGCAATTAATGTCTAAATAAAGACG  
 Oligo31 GAGGCGTTGTGGCGTCTGTGCGATGGCAAAGATAAGAACGC  
 Oligo32 AACAAAGTGTTCGAGGAGGCCGTTGTTTTAGATTAGCCCTG  
 Oligo33 AAGAAACGTTACATCCCCCTCACAAAGCATGAGTTATATAA  
 Oligo34 GTTTCCTCAGTGCCTGCGCCACGTGGTGCATTATAATCAA  
 Oligo35 AAGCCAGTACCTCCAGGCTCCTACATTTCCCTTCATTA  
 Oligo36 AATAGGTGGAGGCCGGTACCCCTAGCTGAACATGGCTCCCGG



Oligo37 CAGTTTCTGGCAAGGGCTGAGGGCAGTAACCCTCATTCAA  
Oligo38 AACGAGGGGAACCTCGCTGTGCGGGTCTGAGAATTTTATCGG  
Oligo39 AAGGGAACACGTTGCGCATGAAGCCATAGAAGTTTATCAT  
Oligo40 AAAATCTAGGTGACCGTTGGCGTACCGTCCCAGGCGGAAGA  
Oligo41 TCATTGAAGTTGGCCGCTGACTTCTCGATTCAATAT  
Oligo42 TGTAGCTCATTCGCGGTGGACGCCTTTGATAAATCAAATGC  
Oligo43 TAAATCGCCTATGCGCGTAGACGCAGAATTCCATAAAAAGC  
Oligo44 AATCGATGCGCAGCCCGCCAGCACACTCGTCCTTTATAAGAG  
Oligo45 GCGGATTGCTTCTGAGATTCTACTAAATAATCAAACG  
Oligo46 TCACGACGCGGCAAGGATTTACTGCTCGACCGTGACCCAG  
Oligo47 CTCACTGTCTCTGCTCCGCTGCGGTTTTCTAGACTTGCG  
Oligo48 AATAGCCCAAACGACGAGGGGCACGAAAAAGGAGAGGAAAAAG  
Oligo49 AAAGGGAGGCAGCACTGCAAGAACGGGAAATAACATAATA  
Oligo50 GGTCAGTTATCAGGGAGTACCGCCTCTCAATGCGCGTATCT  
Oligo51 CAATATAGCCCGCCTGAAAGACGCTGGAATACATTTTAT  
Oligo52 TACATTTACTGGCGTCCCCTGAGTCCCATAATTGCGTTAAT  
Oligo53 CGCGAGATATCACTCGTGAGCCAGTACTTAATTAAGAA  
Oligo54 GACAAAAGCTAAGCCGAAGCGGAAAGCCAAATAAGAAGTACC  
Oligo55 AGAAGGCGGCACCACACGAGAAGGACGTCAAGAAAGATAT  
Oligo56 ATTAGACGCTGGCTCGCAAGGGCAGCGTTTTGACCCAGCGC  
Oligo57 AATACATTGCTGTTGGTTACACGCCGGTAATAAGTAGAA  
Oligo58 CAGCACCGTGCTGCCGCAAGCGAGAAAAACCAGCGCCGATAG  
Oligo59 GATATTCCAAGATGGTAGGTCCTTGATATTTGCCAGCCTT  
Oligo60 GTCGAGAGCAACTGGAGTGGCGACCGTACTACAGGAGTGCC  
Oligo61 TGTATGGGTGCGCGAGACCGTTCTAGGGCACCCCTTTTT  
Oligo62 GTCACCCCTCAAAGCACGCCCACCGTGTGAAAAATCTGGATC  
Oligo63 GCCGGAACCAACGACGTGTCAGTCCGACACGGGTAACCTTA  
Oligo64 CTCATTATCAACGGGCACAGCCCATCGGCGGCTGACCACTGG  
Oligo65 GTCCAATCGCAAGGTTCTCCGACTCAACATTTAGGATAGC  
Oligo66 GGCTTAGACGTCCCTGCGCAATAGGCCGACTCTTTACCGGAT  
Oligo67 TTAAGCAGAGTGTGTGTTTCGACGGGCTGATTCCAAAA  
Oligo68 CATTGCCTGAGAGTCTGTTGACGATGTGATAAGGATACAGGT  
Oligo69 ACCCGTCAGATAGGCTGGCTCCGTGTGACCCAAAAATAACA  
Oligo70 TTAAGTTGCAAGGCTGTTCCGCAACGGGGGTTTGGGGGCGA  
Oligo71 GTGAGCTGGACTGTGAGCGACCGGTTCGGAGCGAGGAATGA  
Oligo72 AAATCGGCCAGCATTCCCTAGCCTCCCGTAGTATTGGTTCCG  
Oligo73 CAGATTCGGGAACACCACCACTGATGAACCTGAGTATTGG  
Oligo74 CCTCAAATGGACTTGCAAGGCGGCGAAAACGCCCTAACTGAA  
Oligo75 TTCCTGAGGCTTCTTTCGCGCATGATGATTTTAGAATCATA  
Oligo76 TGAAACAAGGTCCCGACAGCTTCGCGTATTAGGTTTAGATGA  
Oligo77 TGATGCAAAGCAGGAGCATTGCCGTACCTTAGAAAAATGC  
Oligo78 CGAGCCTGAGTCCCGACTCGAAGGTAACAAGGAATCAATTTT  
Oligo79 CCGCGCCCGGGAGCAGACGTGTGGTGTATCCCATCCATTA  
Oligo80 AGAGAGAAGAACGAACGAGCGGGATTACAATTTTATTTTAC  
Oligo81 TATTACGACATTCCCATTAGCCGGGATAAACAATGCTCCT  
Oligo82 CGGAAACGCGACGATTTGCAGCGCTTCTCAAAGGGCGAAGGC  
Oligo83 AGTTGAACGAGCAGACCGGCACGGGTCATAATCAACAGG  
Oligo84 GTTTTGTCTGTGCGTCGAGGCGACTAAGGGTAATAAGCGGG  
Oligo85 TCTTTCCTAGTTGGGCCGGTCCCGTCCACCACCTTGTCTG  
Oligo86 CAGGGAGTCCGGATGCCTTCTGCTTCTCAGAAGGCTCGCTTG  
Oligo87 GAAATCCGGTGCGAACCTGTGGCCGACTATAATGCCGTGTC  
Oligo88 TGAATTACGGGAGTCTGCCGAGAATGGCGGAGTAATCATTG  
Oligo89 GTAATAGCGTGCTTTCCATGTCGGTCTCATTCAAAGGGG  
Oligo75 TCCTTTTGCTACCTGGGCCACTGCACGCTATTATAGTATTGC  
Oligo91 CATAACAGCGCATTACCTGGAACGACATGCGAACGTAAT  
Oligo92 TTTTTGAGCTCACACCGCAGTAGCCCGAGCTAGAACCAGCTA  
Oligo93 TCATCAACCTACGTAGACCGCACGATAGGATTGTAAGCTT  
Oligo94 CTGGCGAAGTAGTGCCGCGACGCTGATGCAACAGTATGCCAG  
Oligo95 TAAAGTGCCTCCCTTCGGACCCACGTAGGCTAGCGAAGCA  
Oligo96 AGGCGAAAACGGTGGTCACCGGTGCGTGCAGTGGTTCCAGC  
Oligo97 AATCGTCCCGACTGCCGGATGGTTTCGATCTCAAACCGCTC  
Oligo98 ATGAAAACTTTTCTTCTAGCTTATGGCTGCATTAAGCAA  
Oligo99 CCACCAGCTAGGGCCCGGTCGAGATCACTTTACAGAAA  
Oligo100 CATTTCAGCATTGAGGCCCTCGGAAGGAATGAATATTTATT  
Oligo101 GGTTGGGGCATGGACCCAGGTGAAGATTAACATAGCTTA  
Oligo102 GCCAACATGTCAGCTGCTCTCCGTCCGGTTAGAAAAACAAC  
Oligo103 CGTTTTTCGAGGCACACGTCTAGGTTGTACGAGCACAAAGC  
Oligo104 AACGTCAACGCTCTGTTCCGCGCACTACCATTTACCAATGTTT

Oligo105 CCAAAAGCCGCGTTCGGCGAAACGGGAAAATAGCTAATAC  
Oligo106 CACCAGTAGGCCGGAAGTTGTTTATCCAAACCGATTGAAAAT  
Oligo107 CCACCAGTACAGGCATGAGTGC GGCGGCCGGAACCAACCA  
Oligo108 CTCCTCAAGACGTAATGACTAAACCCGAGGGGGTCATGAGA  
Oligo109 AGTTAGCATGGATACCGGCGGCTGGCGAAGGGATACTCAT  
Oligo110 ATAACCGATGCCGCTGTGCTCGCAGGTGCCTTTACACGC  
Oligo111 ATTTGTACCTGGCCAAAACCTGGAGATAAGGCACCCGGAG  
Oligo112 GAGATGGTTTCGCATATGCGGATCCCAACTCGAACCCGGGCTT  
Oligo113 CTTTTGCTTCGCGCGTTGGAGTCGATTTAGATACAAGAGG  
Oligo114 AGGTCAGGGGCTAGTGCCAGCCCGTCTAAAAGCGGACCAAC  
Oligo115 AATAGTAGCCTACAGTTTGTGGCCGAATTTAGTTTCTACT  
Oligo116 CTGATAAAGCGCAGCAGTCGATAGCGCGTTTTTAAATCTAG  
Oligo117 TTCGCGTACTCGAGGCTAGGTTCAACTTATATTTAAATAA  
Oligo118 TCGGTGCGGCGGAATTGACGTCAATGCCCTGGAAGATGGCGA  
Oligo119 AATTCCAGTTGTTGTTCTCTCTCCGCGGACGCATGCTCAC  
Oligo120 AGCAAGCGCTTACGTTAAGCACTGCGCTGACCAGTGGTTGC  
Oligo121 CTCATGGACCCTGTAGGCCTCCCTCGGTCTTGCTGAAAACG  
Oligo122 CAACAGTGC GGACCCGGCTGTGGAGCTAAAACGAACCCGCTG  
Oligo123 TAACATTGGAGGCCTCTGCATCTGCACCTCGACAATTGAG  
Oligo124 AGTTACAAAGACCGCGTAGGACCGCTGAATAGTACCTTACCA  
Oligo125 GAGAGACGATGAGTACGCATCGTCCAACTTAGATGGTCT  
Oligo126 GCTTAATTGTAGGCCGGCACTGGCACGGTAAGTATCAGTAGG  
Oligo127 AGTACCGTGTGCGAGGCCACAGGTGAGAACCAATCAACCA  
Oligo128 CCAATCCACAAACCGTTCAGCCACATCAAGCGTCTTTATC  
Oligo129 ACCGAGGACATCGGGTGGTGCCTAGAACGAAGCCAGGAA  
Oligo130 GAGCCATTAGGGCGACGCACGTCATAACAAAAGGTAAGACTT  
Oligo131 CACCACCTCTGTATGCTAGGTGCTCGTGCCACCCGAGAGC  
Oligo132 CTGAAACAGCGGCCCTGCCAAGCTGCCCTAGTAACATTATT  
Oligo133 GCCTGTAATCGGGCGTCCCTAACTTCTGCAATAGGACAAC  
Oligo134 GCCGACAACGGCATGGCGAACAAGGACAGCGGTTTATGTTGC  
Oligo135 TACCAAGTCTCGCCACCCTCACCTTGTGAACGAAAGATTA  
Oligo136 AAACACCACACCTTCTGCACTGTGCTACGTACCCAAAACGAG  
Oligo137 ACGACGAGCTTACACAGACCCTACCGCGAAAAAGGAACCG  
Oligo138 AAGCGAACAAACACTCCGTACTCCACCCTAAAAAGATCTTCA  
Oligo139 CGAGCTGTTGCGCAAAAAGCGCGAAGATAAGATACAGGGCG  
Oligo140 CACCATCATGTTGAGTCCGCTGCCATGAAACTGAGTACAAAT  
Oligo141 TTAACCACTCCGAGGTCGCCGAGGGATAACGTTAATTTT  
Oligo142 TTCAGGCTCACGCAACACTCCCGTCTAGATAGCCAGCCGCCA  
Oligo143 TTTCTGACTCGAACCCGACCCTGCAGCCCCGTATAGCTG  
Oligo144 CCCTTACTGTGCACCCGCCGGATGGTGTTAACAGCTGATTG  
Oligo145 TACCGCCAAGACAACAGCGCCAGGCTCGCCAGAACAATAT  
Oligo146 AGGTGAGGGTATAGCGCCATCGGGCATAAAGATAAAAACAG  
Oligo147 CCGAACGGGACCCAGCCGAGAGCCGACGTAAATCCTTTGC  
Oligo148 AACGGATTAACCTGCGTGAGTGAAGGAACCTGGGAGAAACAAT  
Oligo149 AATAGTGACAGGTGTAGGATCGGGCGCGCTGAGAAGAGTC  
Oligo150 ACCAGTATGGCATCAACTGTGGTGACGAAATACAAATTCTT  
Oligo151 TTATCATAGACCTCTGCTTGTGCCACAAGGCTGTCTTTCC  
Oligo152 GTTACAAAGCGCCAGCGACTGGGCGTCTCCCTAATTTGCCA  
Oligo153 AGATAGCTCTGCTCAACACTCACCGCATAGAAAAGTAAGC  
Oligo154 TTAAAGGTAGTCCGCCCTACAGAAGTTCCGGGAAATTATTCA  
Oligo155 GCCACCCCCCGTGC AAAAGAGCAAACGATCCCTCAGAGCC  
Oligo156 TGCCCCCTAGCAGCCCGTCCGTGATGAGTCATAAACAGTTAA  
Oligo157 TGAGTTTAGGCCAGAGTCGAGTGCATGCGTACCGTAACAC  
Oligo158 TTTCTTAAATCCGGGCATTTGGGAAGCCGTTTCGAGGTGAA  
Oligo159 AAACACTGGCCGCGTCTTAGTTACGACAAGAATACTACTA  
Oligo160 CATTAGTCCGGGCCGCGCATACGGACCCAAACAAAAGCTGCT  
Oligo161 GCAACACTGACTGGGCAAGTGGTTGCTGAGGCATAGTAAGA  
Oligo162 TTCAAATATCGTTCGCGGTGATGATATTAAGCCCGAAAGAC  
Oligo163 CCTGTTTGTTCGTTTCGATGATTGTCGTCATGGTCAATAA  
Oligo164 AAGGGTGAACCCGTGTCGGGCCACATGGTAGGTAAGATTCAA  
Oligo165 ATTAATCTTACGTGGGCGTCGAGAAGAGTTAAAATTCGC  
Oligo166 GCCGAAAACCTGTTGTGTCACCTCGGAGTTACCGCTTCTGGT  
Oligo167 GCTCGAAACCCGAAGAGGACGTGTGCCCCCGGTACCGA  
Oligo168 AGAGTCCACTATTTTAAATGAACGCTTTCAGTCGGGGGTGCGCGT  
Oligo169 TATCTAAAATATCTTTTGAATACCTGAAAGCGTAAGAGCAATACA  
Oligo170 CAGTACATAAATCGCACGTAAATGGAAGGGTTAGAAAAGATTAGGT  
Oligo171 AACATGTTACAGTCCGTGTGAATCTTCTGACCTAAATGCTTCTAA  
Oligo172 GGGTAATTGAGCGTTAAATCATAGCGAACCTCCCGACAACAATA

Oligo173 CGTCAGACTGTAGAATAGAAAAAAGACACCACGGAACAAGAATGA  
Oligo174 ACCGTACTIONCAGGAGCGTCATATGGAAAGCGCAGTCTGTCATAGAG  
Oligo175 AACGGCTACAGAGCGAATAATCGGAGTGAGAATAGAAACCGCCTC  
Oligo176 AATAAAACGAACGTACAGACGAACTGACCAACTTTTCATGAGGC  
Oligo177 TGTTTTAAATGATGACCATCCCCCTCAAATGCTTTAGAAAAGTT  
Oligo178 GTAATCGTAAAACGGGAGAAGTGTACCAAAAAACATTAGTTTCACA  
Oligo179 AAAACGACGGCCACATCGTAACCGTAATGGGATAGGCCGGTTGCG  
Oligo180 TCCCTTATAAATCCGGTTTGCAAGCCTGGGGTGCCTCAAGTCCGG  
Oligo181 AACCTCAATCAAAACTGATACAGTCACACGACCAGTCACTTGAA  
Oligo182 CAAGAAAACAAAAGATTTTCATCAGATGATGGCAATTGAGGACA  
Oligo183 AAGAGAAATATAAATAAACACCTCCAATCGCAAGACAATTTTCCAT  
Oligo184 ATAAAAACAGGGACAGCTACAATAGCAAGCAAATCAAATAATAAT  
Oligo185 CAATGAAACCATCAAAGACAAGTATGTTAGCAAAACGAGCAAGAAC  
Oligo186 ACCAGGCGGATAAGTGTACTGCAGGTGACGATTGTCTTTTCAC  
Oligo187 GGCCGCTTTTTCGCCAAAAAACGTTAGTAAATGAAAGAGCCAGT  
Oligo188 TGCGATTTTAAGATTCATCAAGACCTGCTCCATGTTAAATACGAA  
Oligo189 GAGGTCATTTTTGCCTGACTAAAATGTTTAGACTGGAATACCATA  
Oligo175 CTACAAAGGCTATAAAATTTAAGGCAAAGAATTAGCAATTCTAA  
Oligo191 GGATGTGCTGCAAGGACGACGTTAAATGTGAGCGAGACAGGAAAT  
Oligo192 ACGTGGTTTTCCTTTTCTGAAATTGTTATCCGGCTAGTAGC  
Oligo193 GCTGAGAGCCAGCAATACCGAATACCTACATTTTGATATCGGCC  
Oligo194 GCGCAGAGGCCGAAACAGTAACCATTTTGCGGAACAAAAACAATAC  
Oligo195 ATCGCCATATTTAGCCTGTTTCTTTTAACTCCGGCGATAGTC  
Oligo196 AGAAACGATTTTTTCGCTAACGCTCATCGAGAACAAGTGTAGAAGA  
Oligo197 AATTAGAGCCAGCAGGGAGGGACGCAATAATAACGGATCTTACTA  
Oligo198 AGTATTAAGAGCGGTGCCTTGCAGAGCCGCCACCAGAGAGCCAGG  
Oligo199 AACAAACATCGCATTTGTATCATTCCACAGACAGCCGCAAGCCAA  
Oligo200 GAGTAGTAAATTTGATATTCATCGAAACAAAGTACAAAACCTAAAC  
Oligo201 CCGGAAGCAAACCTTGCATCAAAAACCAAATAGCGTAACGCCAC  
Oligo202 GATATTC AACCGTTGCAATGCAAGGTGGCATCAATTGACCATTGA  
Oligo203 AACTGTTGGGAAGCGCACTCCAGGAACGCCATCAAAAATTGTAAT  
Oligo204 CTGGCCAACAGAGGATTAGTGATAGGGTTGAGTGTACGCGCGGCT  
Oligo205 TGATTGTTGGATAATAGATCAAAATCAACAGTTGAAGTCTTTATT  
Oligo206 TTTTTCAAATATAGTCGTAATTTTCAATTTGAATTATAAAGAACC  
Oligo207 CCGGTATTCTAAGTCTGAAAAAGTAATTCTGTCCGGCGTTAAAC  
Oligo208 AAAGGTGGCAACAAGCCCAAAGAATTAAGTGAACATTGCTATTAT  
Oligo209 ACAATAAATCCTATTAGCGATCAGTAGCGACAGATGGTTTACAT  
Oligo210 TTGCTAAACAACCTGAACCGTTGATATAAGTATAGTTGATGAAA  
Oligo211 GCGCAGACGGTCACCATTAAGCAGCGAAAGACAGCTCACGTTGTT  
Oligo212 CGGAATCGTCATAAGTTGAGCAGTCAGGACGTTGGATAGGCTGAG  
Oligo213 AGCCTCAGAGCATTAACAGTTTAATTGCTGAATATAAATCAGGTG  
Oligo214 TCTCCGTGGGAACGAAAAGCGAGTCTGGAGCAAACCTCAACGCAA  
Oligo215 CACATTAATTGCGCTTTGATTAACGCCAGGGTTTTTCTGCCAGAT  
Oligo216 ATGGATTATTTACAGAAGAACCTGTTTGGATGGTGGGCGCCAGGCA  
Oligo217 AGCGGAATTATCAGTATTAGTAAAGCATCACCTTGAACATCGCAA  
Oligo218 ATAACTATATGTATCCTTGAACCTGAGCAAAAAGAAACGTCAGAGG  
Oligo219 TCATCGTAGGAATCTAATTTAATTTAGGCAGAGGGCTAATTAAT  
Oligo220 GGCATGATTAAGAAAATAGCATGAAAATAGCAGCCCCTGAATCTT  
Oligo221 GCCGCCAGCATTTGAAATCACACCATTACCATTAGCACATTCAACT  
Oligo222 CGATCTAAAGTTTCAATTTTTCGAAGGATTAGGATTAGTTTTAACCC  
Oligo223 CGCCTGATAAATTAACGATATTCGGTTCGCTGAGCAAAAAGGAAA  
Oligo224 GAAGTTTTGCCAGCTAATGCAATTTCAACTTTAATCTTGACAAAT  
Oligo225 CATTAAACATCCAAAGTAGATTAGAGAGTACCTTTACAGAAGCAAA  
Oligo226 CCTTCTGTAGCCTAAGCAAAAATGCCGGAGAGGGTCTCATATAAG  
Oligo227 ACATACGAGCCGACCGTATCCTCTTCGCTATTACCGGCCCTCAGG  
Oligo228 ATTGCAACAGGAAGTAAATATCCTGGCCCTGAGAGAAGACGGGCCG  
Oligo229 TAATTTTAAAAGTCTCGTATGTCAGTATTAACACCACGAGCC  
Oligo230 TATCAAAATCATATAAGACGCCTGATTGCTTTGAATTTACATCAT  
Oligo231 AGAACGGGTATTAATAATCAGCCAACGCTCAACATATGCGTTTT  
Oligo232 CAAAGTTACCAGACTTTTTAAAACAGCCATATTATTCCAGAGCA  
Oligo233 AACCGCCACCTCAACCGCCATTATCACCGTCACCATATTGACAA  
Oligo234 ACCAGTACAAAACCTAACCCATCTATTTTCGGAACCTAGTGCCCGTAG  
Oligo235 TTTGACCCACAGCGAGGCAAAGCTTGATACCGGATACAGCTTGCTC  
Oligo236 ATAACCCTCGTTTATTACGAATAAGGCTTGCCCTGATCAACGTT  
Oligo237 ATATTTTCAATTTGTTTTCGACGCTTTTAAATTCGAGTAAGAGGATC  
Oligo238 GTTAAATCAGCTCATATTTTAAAGGCCGAGACAGTATGTGTAGCT  
Oligo239 TAATCATGGTCATAAGGATCAGGCAAAGCGCCATTTTTCCGGCTT

*Short inner scaffolds*

Oligo240 ACTCCCTGATAGGCGTCTTTTCAGGCGGGCGGGACTCAGG  
Oligo241 GGGACGCCAGACTGGGCTCACGAGTGATAGGCTTTCCGC  
Oligo242 TTCGGCTTAGGTCTTCTCGTGTGGTGCCCCGCTGCCCTT  
Oligo243 GCGAGCCACGCGGCGTGTAAACCAACAGCATTTTCTCGCT  
Oligo244 TGCGGCAGCATCAAGGACCTACCATCTTGACCGGTCCGC  
Oligo245 ACTCCAGTTGCTAGAACGGTCTCGCGCACACCGGTGGG  
Oligo246 CGTGCTTTGATCCGACTGACACTGCGTGCCGATGGGCT  
Oligo247 GTGCCCGTTGTGAGTCGGAGAACCTTGC GCGGCCTATTG  
Oligo248 CGCAGGGACGCCGTGAAACACAGCACTCCACATCGTAC  
Oligo249 CACGACTCTCACACGGAGCCAGCCTATCTCCCGTTGCGG  
Oligo250 AACAGCCTTGGACCGGTCCGCTCACAGTCTTTTCGTGCC  
Oligo251 CTCGTCTTTCCGTTCTTGCAGTGTGTCAGAGGGCGGTG  
Oligo252 AGAAGGAAAGTCTCACCGGGCGCCCTAGGCCTTCCGAGG  
Oligo253 GCCTCAATGCTCTTACCTGGGTCCATGCCCGGACGGAG  
Oligo254 AGCAGCTGACAACCTAGACGTGTGCCTCGGGTAGTGCGC  
Oligo255 GAACAGAGCGCCCGTTTCGCCGAACGCGGTGGATAAACA  
Oligo256 ACTTCCGGCCCCGCCACTCATGCCTGTACGGGTTAGT  
Oligo257 CATTACGTCCGACGCCCGCCGGTATCCATCTGCGAGCAC  
Oligo258 AGCAGCGGCATCTCCAGTTTTGGGCCAGGGTTGGGATCC  
Oligo259 GCATATGCGAATCGACTCCAACGCGCGAAAGGACGGGCT  
Oligo260 GGCCTAGCCTCGGCCACAACTGTAGGCGCGCTATCGA  
Oligo261 CTGCTCGCGCGTTGAACCTAGCCTCGAGTGGCATTGACG  
Oligo262 TCAATTCCGCGCGGAGAGAGAACAACAACCACGCACCGG  
Oligo263 TGACCACCGTCGAACCATCCGGCAGTCGGGCCATAAGCT  
Oligo264 GCGCTATACTCGGCTCTCGGCTGGGTCCGTTCTTTCAC  
Oligo265 TCACGCAGTTCGCCCCGATCCTACACCTGTCCGTCACCAC  
Oligo266 AGTTGATGCCGTGGCACAAGCAGAGGTCTGGACGCCAG  
Oligo267 TCGCTGGCGCGCGGTGAGTGTGAGCAGAGAACTTCTGT  
Oligo268 AGGGCGGACTGTTTGTCTTTTCGACCGGGCTCATCACGG  
Oligo269 ACGGGCTGCTATGCACTCGACTCTGGCTGGCTTCCCAA  
Oligo270 ATGCCCGGATCGTAACTAAGACGCCGGCCGGTCCGTATG  
Oligo271 CGCGGCCCGGAGCAACCACTGCCAGTCAATATGCTACA  
Oligo272 CGCGCGACGACGACAATCATCGAACGAACACCATGTGGC  
Oligo273 CCGACAGGGTTTCTCGACGCCACGTAAGCTCCGAGGTG  
Oligo274 ACACAACAAGGCACACGTCTTTCGGGCCACCATCCGG  
Oligo275 GCGGTGCACAAGCCTGGCGCTGTTGTCTTTATGCCCGAT  
Oligo276 TGGTGTTCCTTTTCGCCGCTTGAAGTCCCATCATGCC  
Oligo277 GCAAGAAGCCTACGCGAAGCTGTCGGGACCACGGCAATG  
Oligo278 CTCCGTGCTTGTACCTTCGAGTCCGGGCACACCACACG  
Oligo279 TCTGCTCCCGTGAATCCCGCTCGTTTCGTTCTCCCGGCTA  
Oligo280 ATGGGAATGTAGAAGCGCTGCAAACTCGTCGCCCGTGCCG  
Oligo281 GTCTGCTCGTAGTTAGTCGCCTCGACGACGACGGGACC  
Oligo282 GGCCCAACTAGAGAAGCAGAAGGCATCCCGGTCCGGCCAC  
Oligo283 AGTTCGACCCGCAATTCTCGGCAGACTCCCACCGACATG  
Oligo284 GAAAAGCACGGCGTGCAGTGGCCAGGTAGGTTCGTTCCA  
Oligo285 GGTAATGCGTTCCGGCTACTGCGGTGTGAGATCGTGGCG  
Oligo286 TCTACGTAGGCATCAGCGTCGCGGCACTACACGTGGGTC  
Oligo287 CGAAGGGACGCGGGAGGCTAGGGAATGCTGCATCAGTGG  
Oligo288 CCTACAGGGTTAGCTCCACAGCCGGTCCGTGCAGATGC  
Oligo289 AGAGGCCTCCTCAGCGGTCTACGCGGTCTTGGACGATG  
Oligo290 CGTACTCATCCCGTGCCAGTGCCGGCCTACTCACCTGTG  
Oligo291 GCCTGCGACAATGTGGGCTGGAACGGTTTGTAGGGCAC  
Oligo292 CACCCGATGTGTTATGACGTGCGTCCGCTCGAGCACCT  
Oligo293 AGCATAACAGAGGGCAGCTTGGCAGGGCCGCGAAGTTAGG  
Oligo294 GACGCCCGATTGTCCTTGTTCGCCATGCCGCAAGGTGAG  
Oligo295 GGTGGCGAGATGACGACAGTGCAGAAGGTGGCGGTAGGG  
Oligo296 TCTGTGAAGCGGGTGGAGTACGGAGGTGTTCTTCGCGCC  
Oligo297 TTTTGCGAATCATGGCAGCGGACTCAACACCCTCCGGC  
Oligo298 GACCTCGGAGCTAGACGGGAGTGTGCGTGTGCAGGGTG  
Oligo299 CGGTTCCGAGTGCAGTGCCTAACCTGAAGCGAGGGAGG

*Handles to hybridize with nanodisc-DNA conjugates*

Oligo300 TCGGGCCCGTCATCGTCTCATATCCTCAGCAACTGCGGGTTTTTTCTTTCACACCACACTCCATCTA  
Oligo301 GGGCGACTGGCTACCGCTGCTACCCAGATATACCCGCACTTTTTTCTTTCACACCACACTCCATCTA  
Oligo302 TCGTGGGCAAGATATATGTGGTCCGGGATGGGCGGTGCGTTTTTTCTTTCACACCACACTCCATCTA  
Oligo303 CGGCCACAGGGTCAATAGCCGTGCCTCACCCGACTTATTTTTTCTTTCACACCACACTCCATCTA

Oligo304 GAACCGCTAGCCTCGGCCGCGCATTTACACCTTGGTCCATTTTTTCTTCACACCACACTCCATCTA  
Oligo305 CGGTCCAGCACCATGGTCCCGTACCCTCACTCGCCATTGTTTTTCTTCACACCACACTCCATCTA  
Oligo306 GCACAACTCCTGAACAAGGCGCCCAGTGCAGTCGACGCTTTTTTCTTCACACCACACTCCATCTA  
Oligo307 CGACTAGAGCTGCTGTGCGTCCCGTTGCGTGAGTTAGGCTTTTTTCTTCACACCACACTCCATCTA  
Oligo308 CCTACCCTCGGTGCCGAGTCCCTAGACGCTGGGCCAGTATTTTTTCTTCACACCACACTCCATCTA  
Oligo309 CGGCCACCGCTCGGATTATCCACAGATTATGGCGCGAGGTTTTTCTTCACACCACACTCCATCTA  
Oligo310 CCTTGAGCCGCATGCGCTACGTCTTGGCCTCCTACCCTCTTTTTTCTTCACACCACACTCCATCTA  
Oligo311 GCGCAGTCCCGTTCTCGAGTGTGCCACTTGCCCTCAATTTTTTCTTCACACCACACTCCATCTA  
Oligo312 CCTCAACCTCGCTCGAACGTACGCAGCCGCAACACTGGATTTTTTCTTCACACCACACTCCATCTA  
Oligo313 GAAGCGGCATAGCTCCGTCCTCGGGTAGTAAAGCGCGCATTTTTTCTTCACACCACACTCCATCTA  
Oligo314 GGGAACAGCGCATAATTCGCCGTGTGTGGCCATCGCATTTTTTCTTCACACCACACTCCATCTA  
Oligo315 CGACGCCACAACGAACGGCCTCCTCGAAACCTTGTGAGGTTTTTCTTCACACCACACTCCATCTA  
Oligo316 GGGATGTAACACCACGTGGCGCACGCACTGTGTAGGAGCTTTTTTCTTCACACCACACTCCATCTA  
Oligo317 CTGGGAGGTACAGCTAGGGTGACCGGCTCCTGCCCTCATTTTTTCTTCACACCACACTCCATCTA  
Oligo318 GCCCTTGCCACAGACCCGCACAGCGAGTTCTGGCTTCATTTTTTCTTCACACCACACTCCATCTA  
Oligo319 GCGCAACGTGACGGTACGCCAACGGTCACCAGAAGTCAGTTTTTCTTCACACCACACTCCATCTA  
Oligo320 CGGCCAACCTCAAAGGCGTCCACGGCGAATCTGCGTCTATTTTTTCTTCACACCACACTCCATCTA  
Oligo321 CGCGCATAGGGAGTGTGCTGGCGGGCTGCGAGTAAGAATTTTTTCTTCACACCACACTCCATCTA  
Oligo322 CTCAGGAAGCGAGCAGTAAATCCTTGGCCGACCGCAGCGTTTTTCTTCACACCACACTCCATCTA  
Oligo323 GAGCAGAGCAGCTTATCCCTGGGTCTCCGGCATCTGCGCTTTTTTCTTCACACCACACTCCATCTA

## References

1. Douglas, S. M.; Marblestone, A. H.; Teerapittayanon, S.; Vazquez, A.; Church, G. M.; Shih, W. M., Rapid prototyping of 3D DNA-origami shapes with caDNAno. *Nucleic Acids Res* **2009**, *37* (15), 5001-6.
2. Bayrhuber, M.; Meins, T.; Habeck, M.; Becker, S.; Giller, K.; Villinger, S.; Vonrhein, C.; Griesinger, C.; Zweckstetter, M.; Zeth, K., Structure of the human voltage-dependent anion channel. *Proc Natl Acad Sci U S A* **2008**, *105* (40), 15370-5.
3. Raschle, T.; Hiller, S.; Yu, T. Y.; Rice, A. J.; Walz, T.; Wagner, G., Structural and functional characterization of the integral membrane protein VDAC-1 in lipid bilayer nanodiscs. *J Am Chem Soc* **2009**, *131* (49), 17777-9.
